# Supplementary material for: Aqueous reductive amination using a dendritic metal catalyst in a dialysis bag
Source: publisher site journal article supplement (doi:10.3762/bjoc.9.110), 2013-05-17

# Supporting Information File 2

for

## **Aqueous reductive amination using a dendritic metal catalyst in a dialysis bag**

Jorgen S. Willemsen, Jan C. M. van Hest\* and Floris P. J. T. Rutjes\*

Address: Radboud University Nijmegen, Institute for Molecules and Materials,  
Heyendaalseweg 135, 6525 AJ Nijmegen, The Netherlands

Email: Jan C. M. van Hest - [J.vanHest@science.ru.nl](mailto:J.vanHest@science.ru.nl), Floris P. J. T. Rutjes -  
[F.Rutjes@science.ru.nl](mailto:F.Rutjes@science.ru.nl)

\* Corresponding author

### **Spectra of compounds**

**2** <sup>1</sup>H NMR

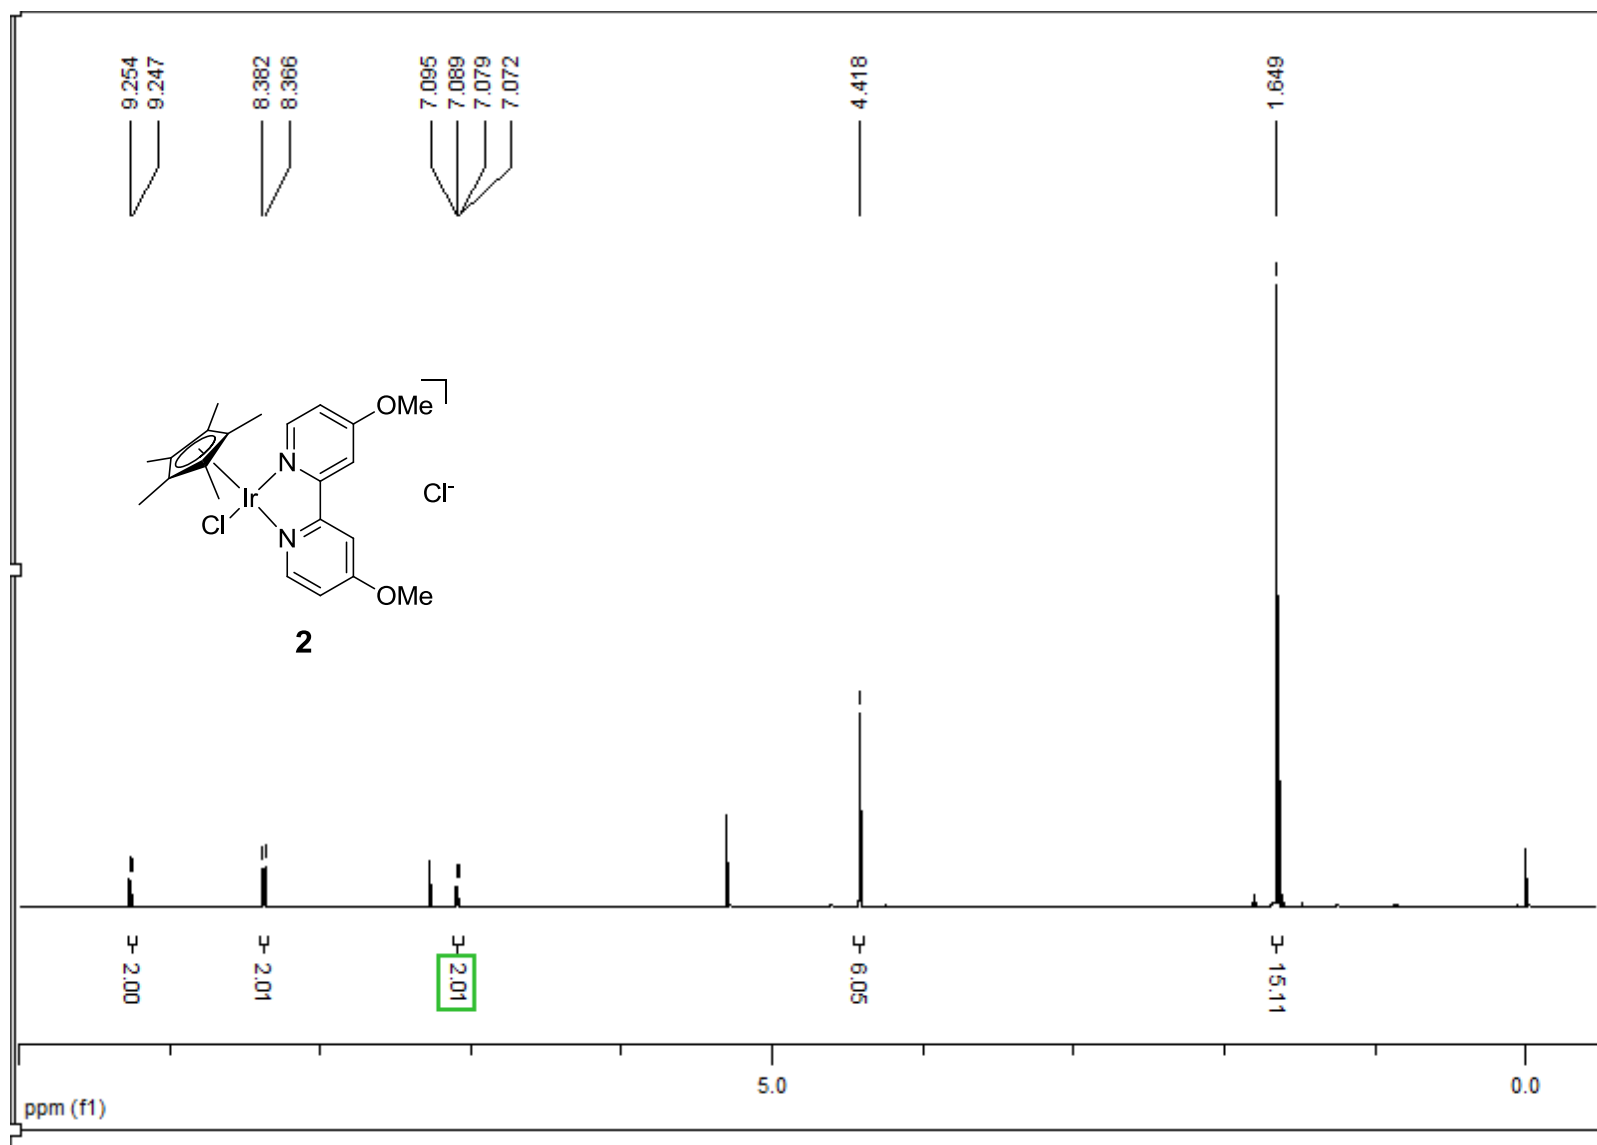

2 <sup>13</sup>C NMR

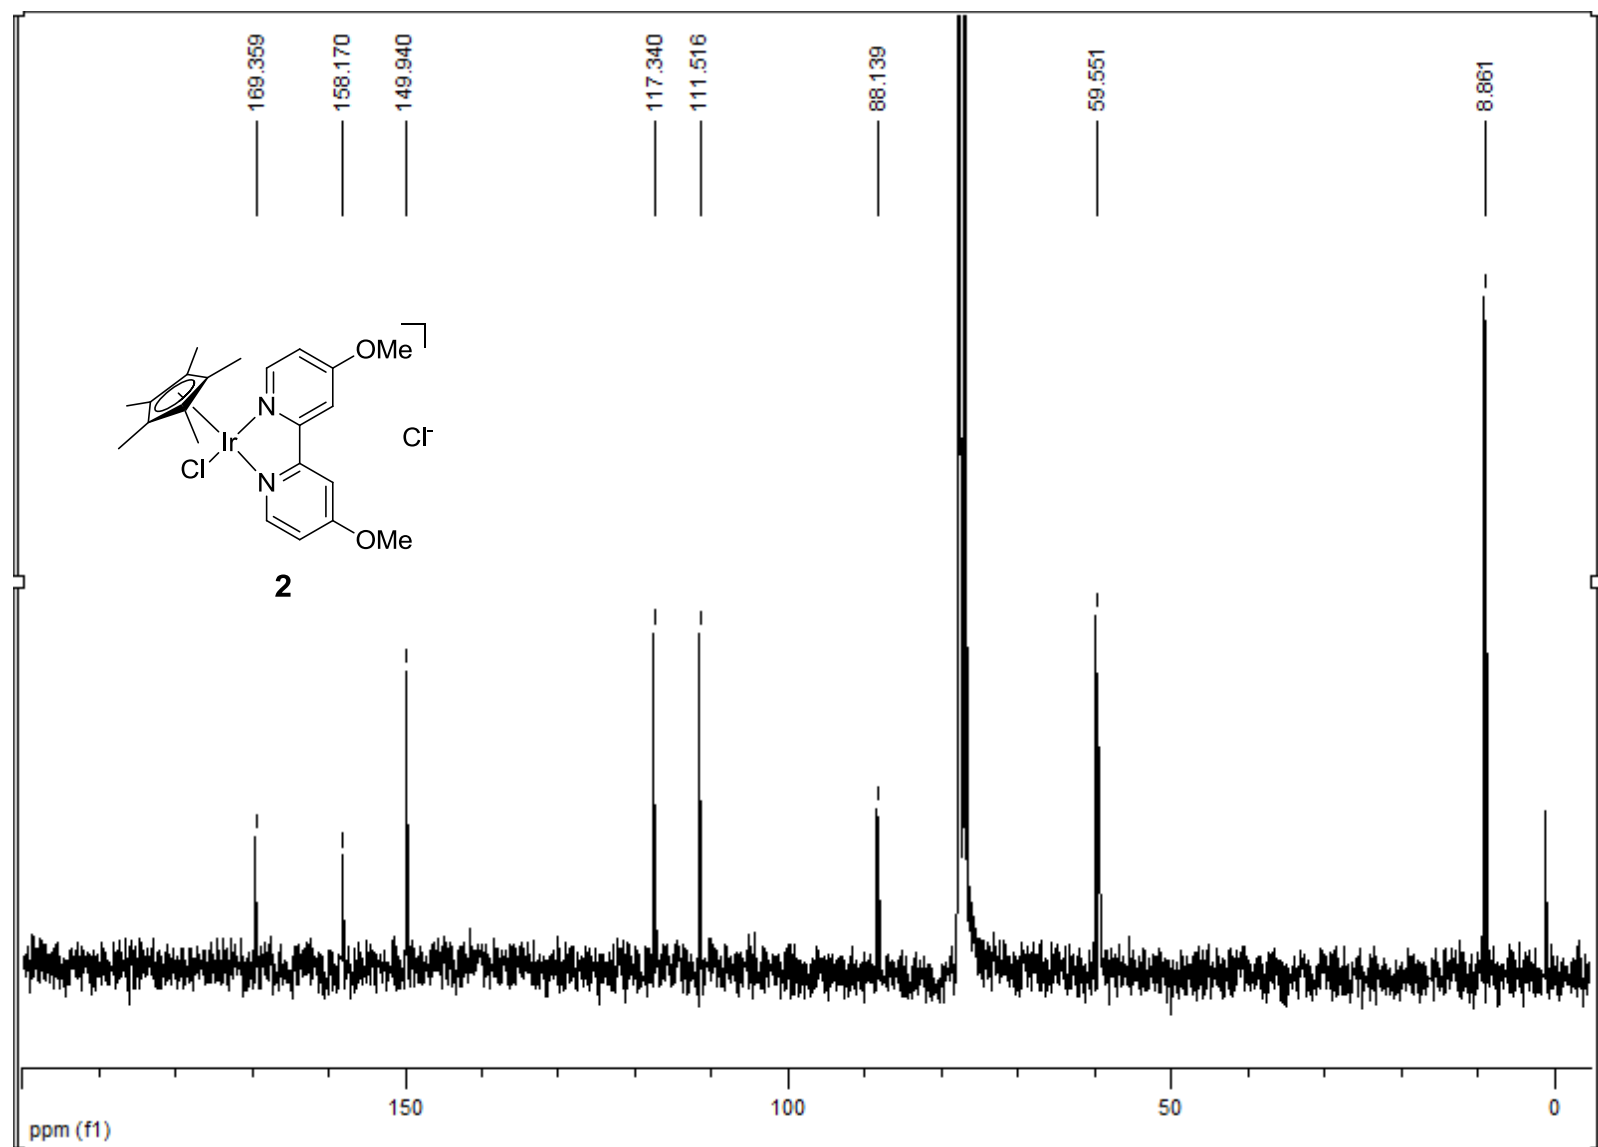

3 <sup>1</sup>H NMR

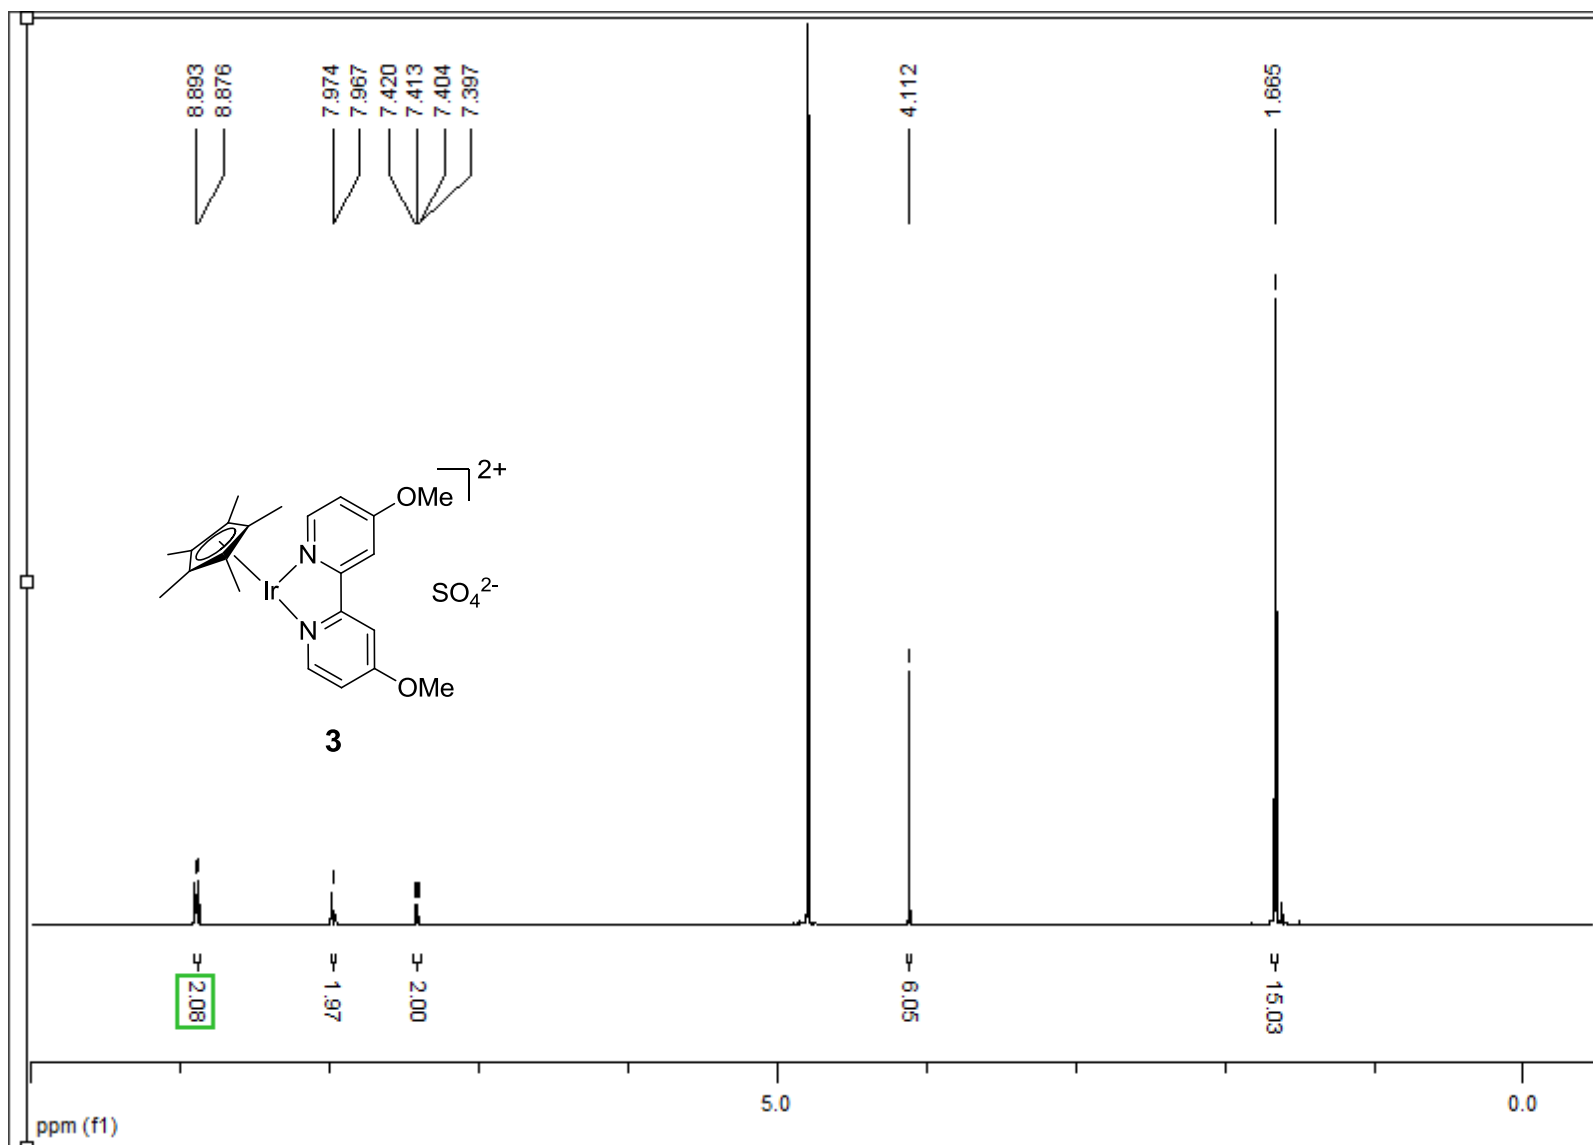

**3** ( $^{13}\text{C}$  NMR)

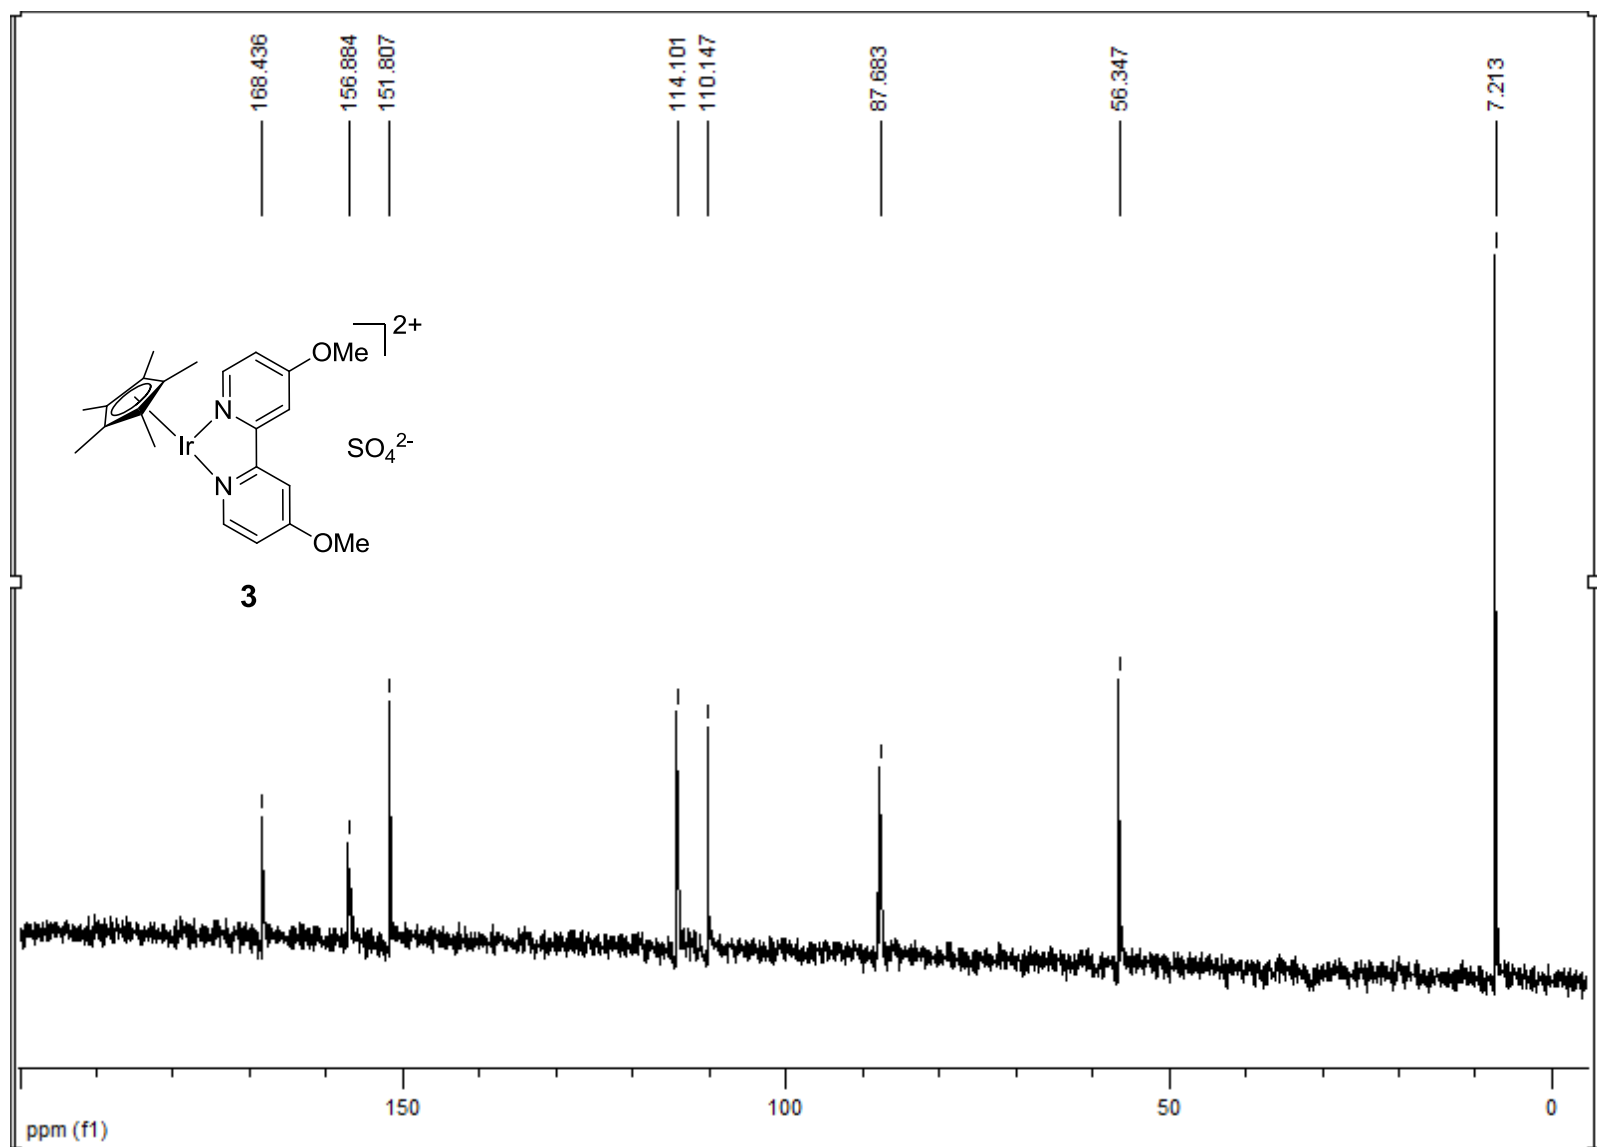

4 <sup>1</sup>H NMR

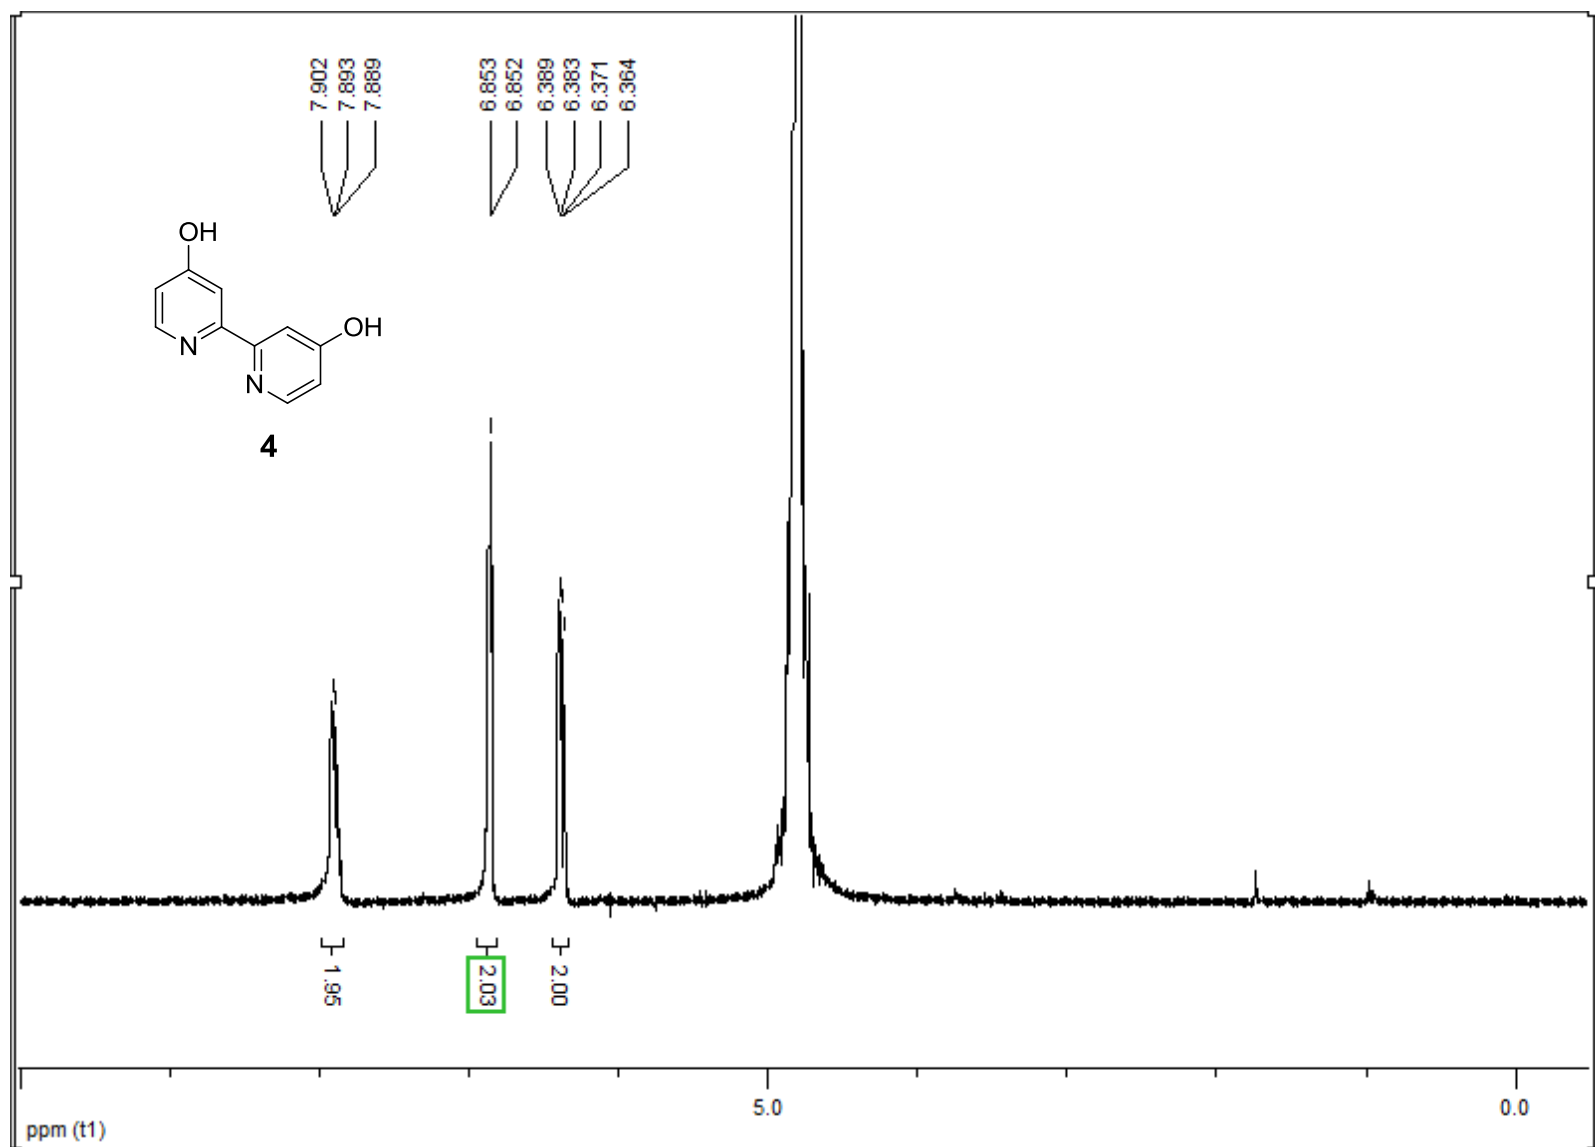

4 <sup>13</sup>C NMR

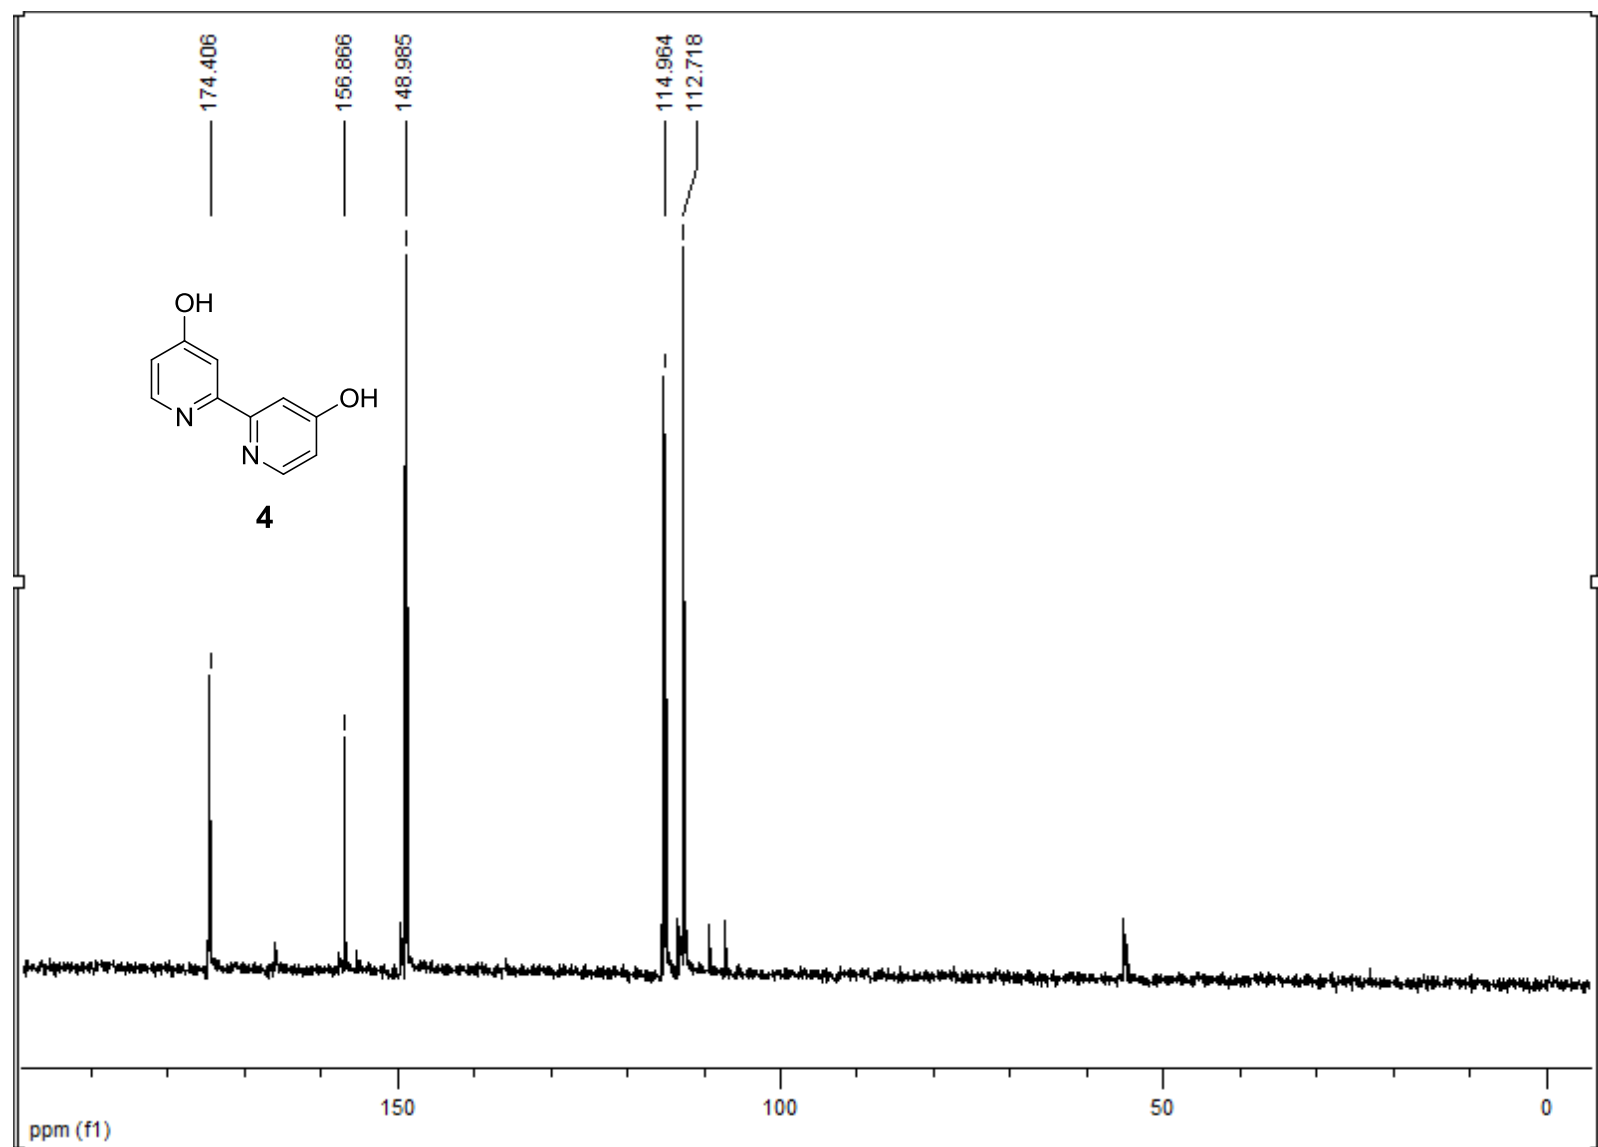

5 <sup>1</sup>H NMR

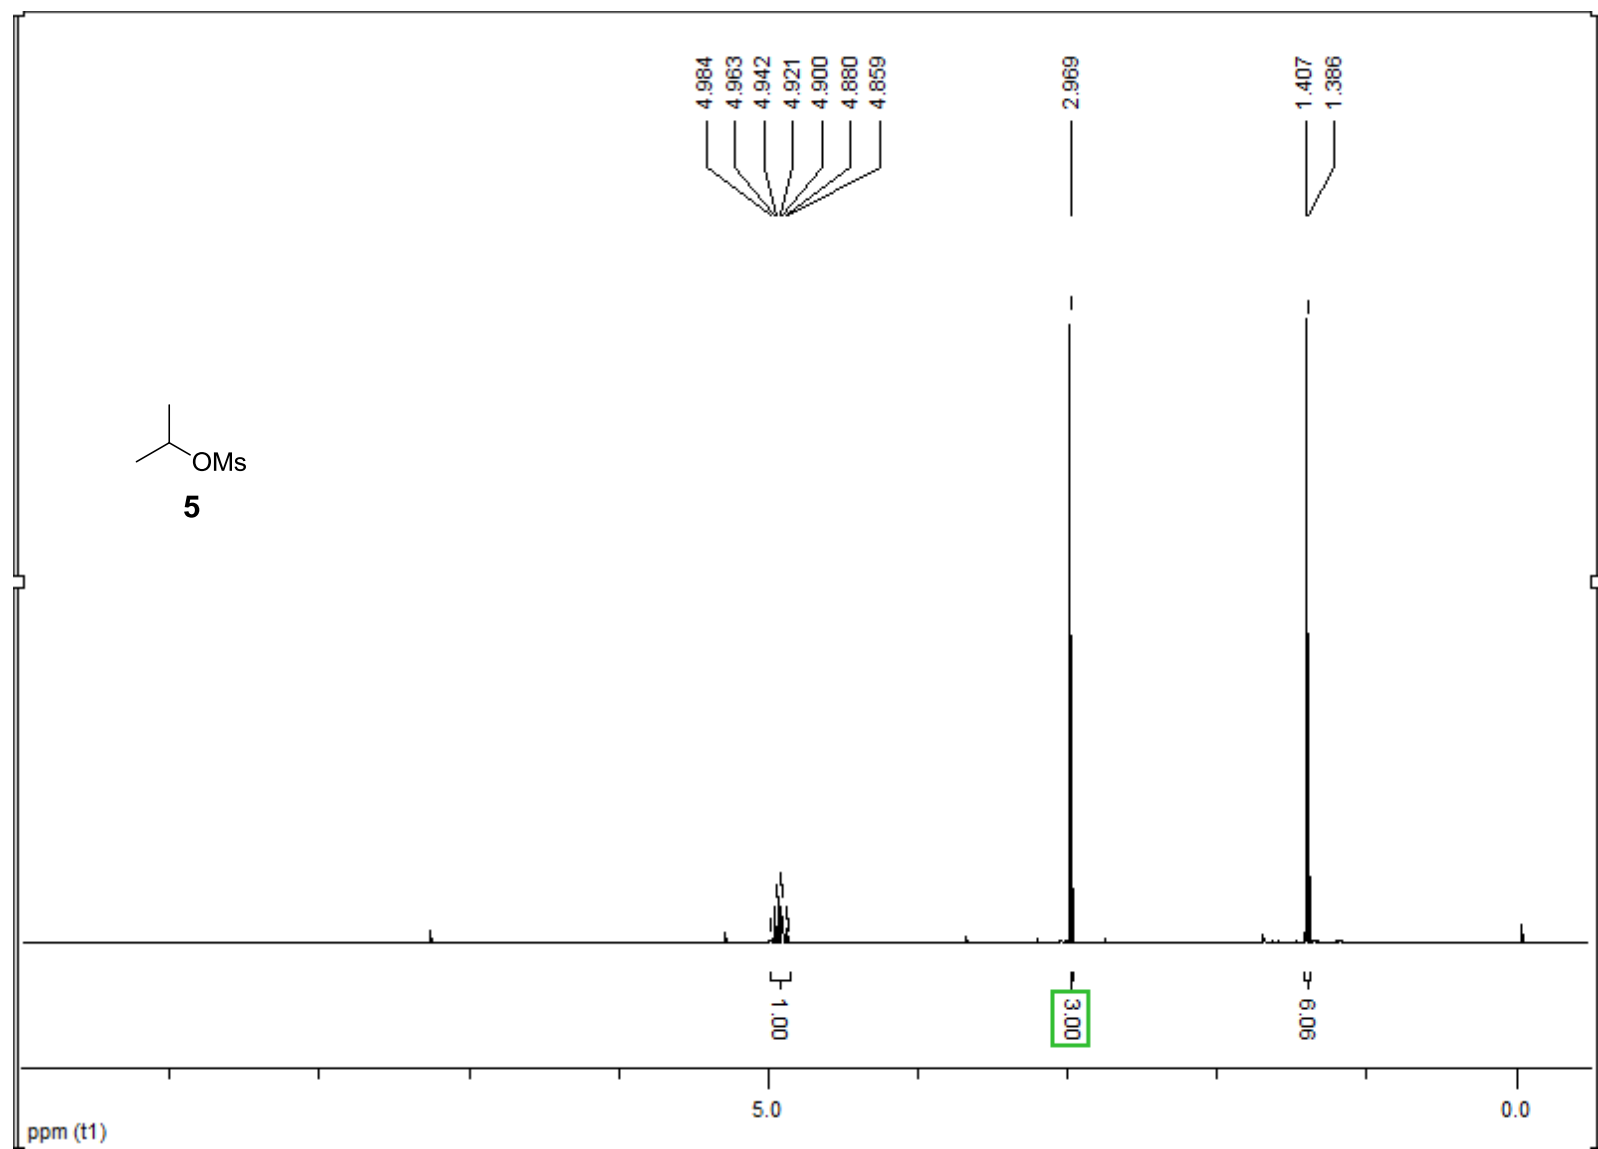



5 <sup>13</sup>C NMR

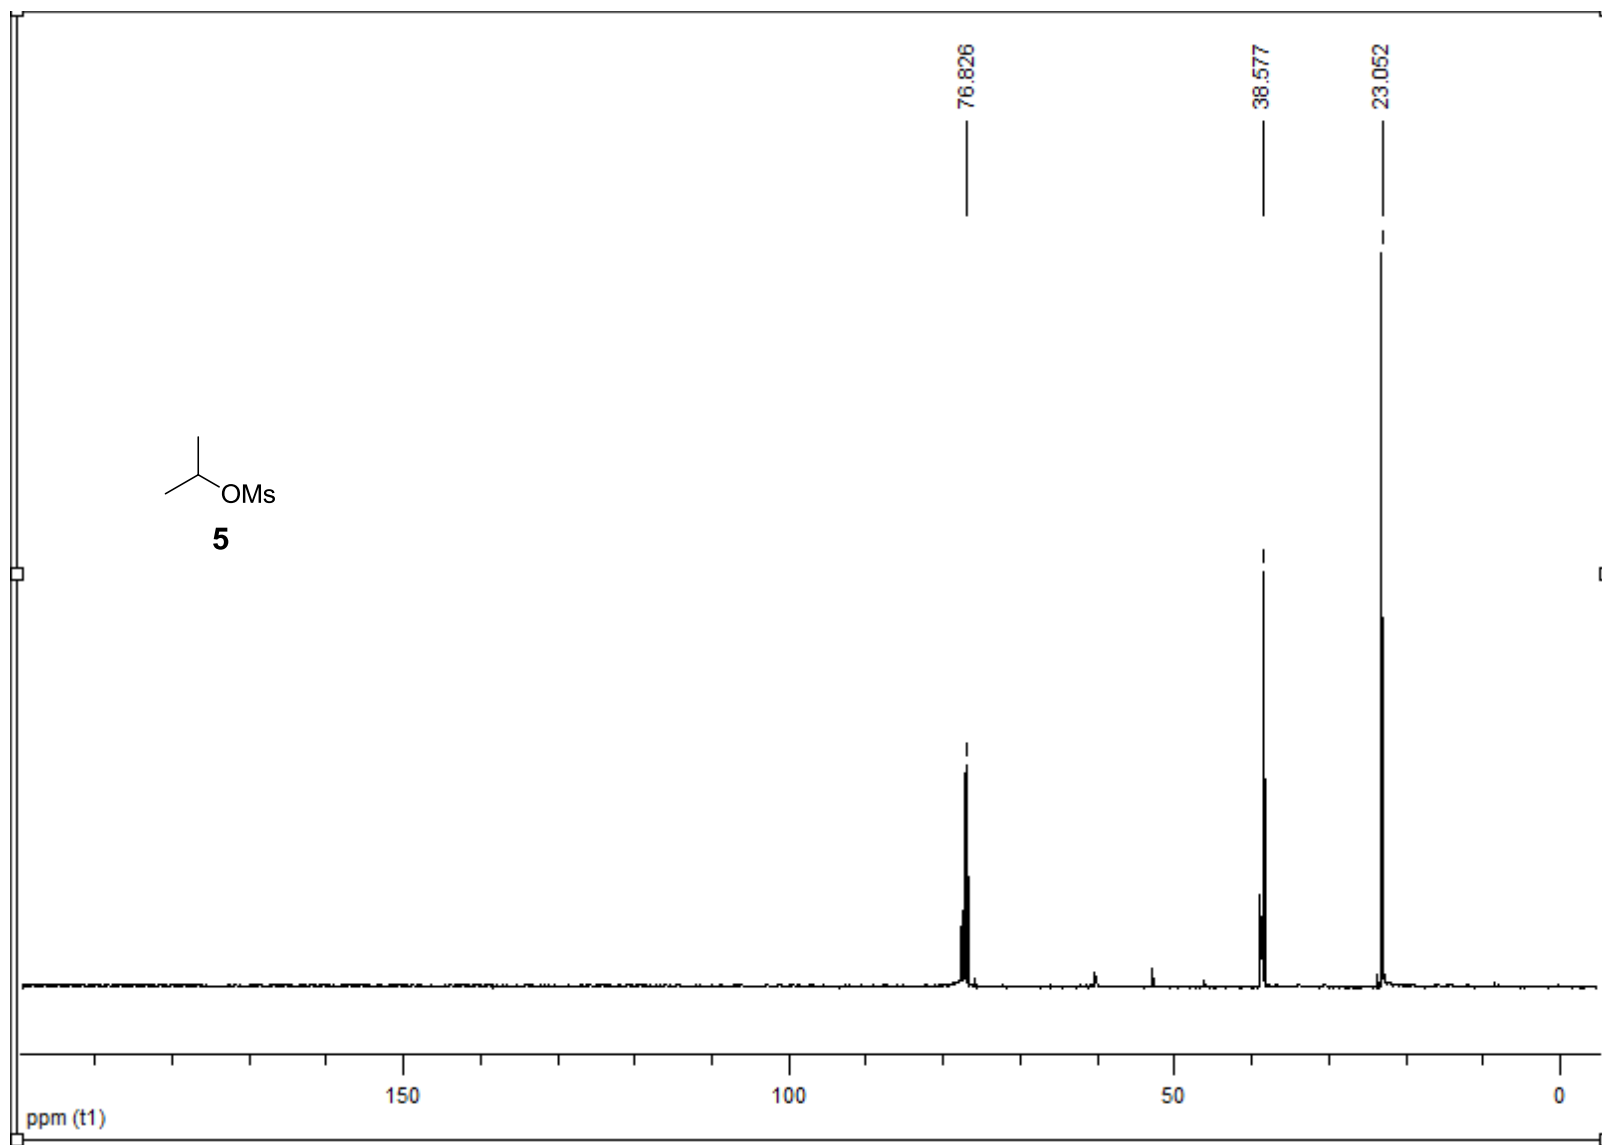

6a <sup>1</sup>H NMR

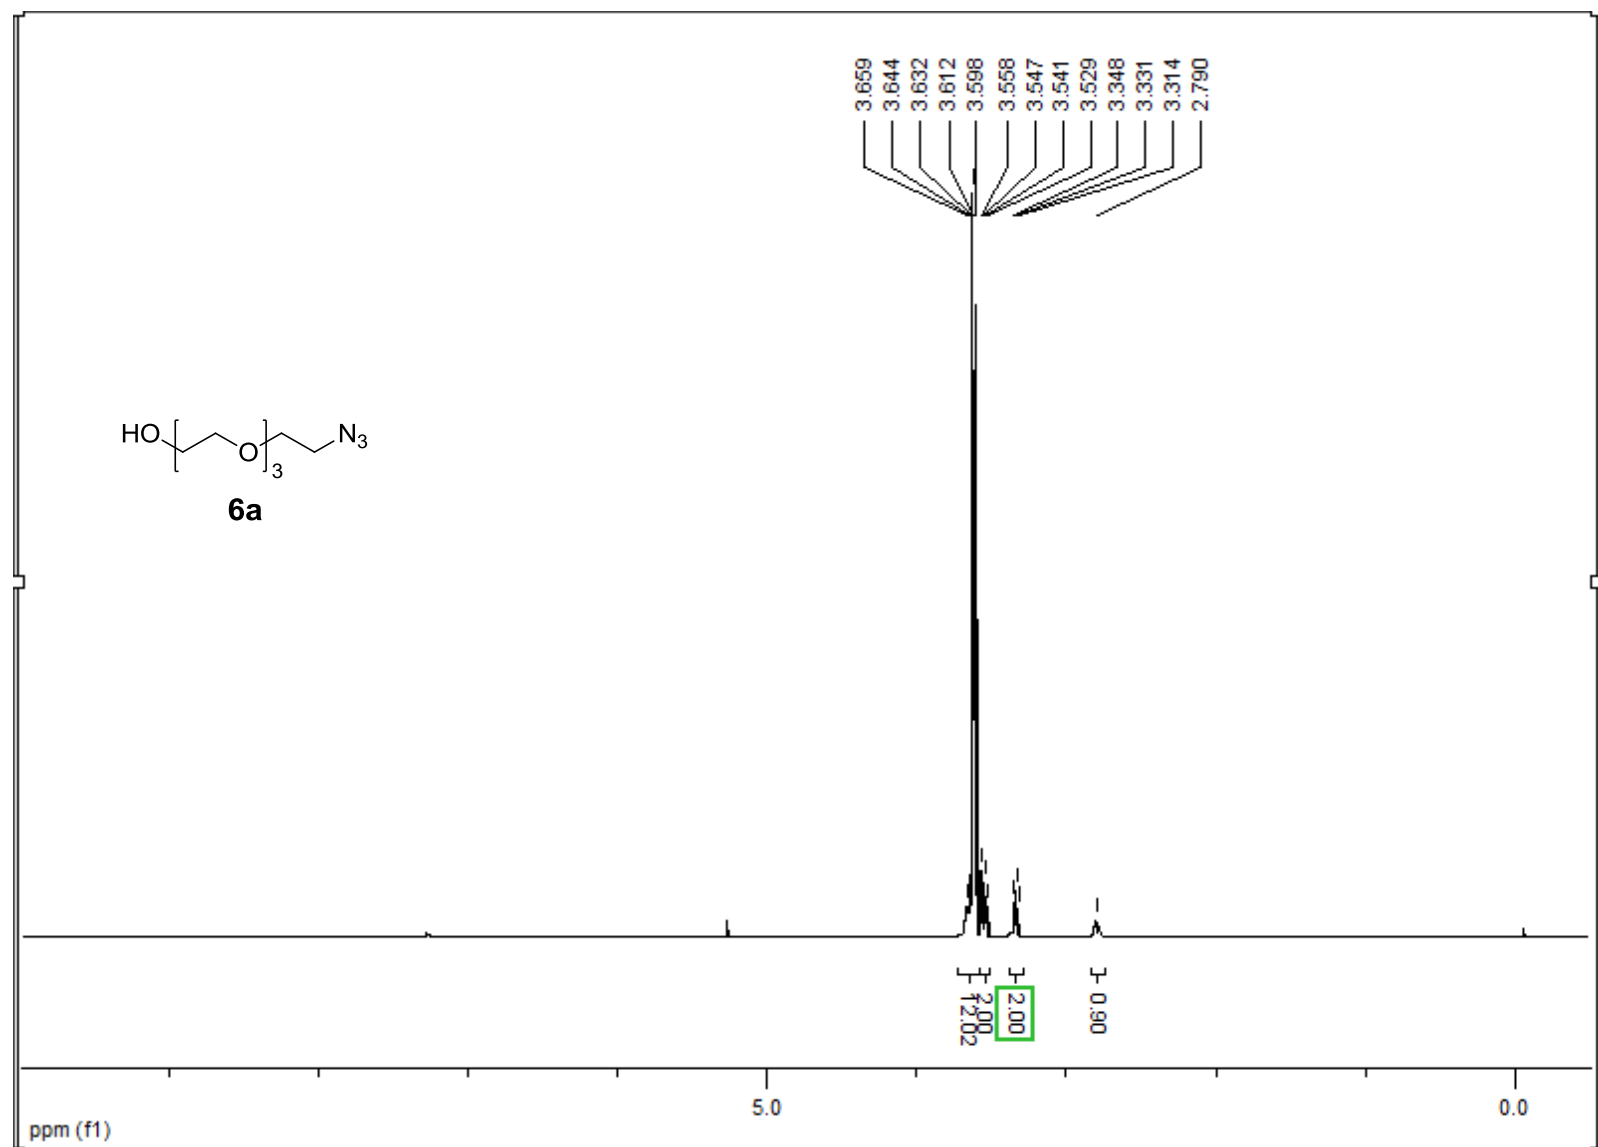

6a <sup>13</sup>C NMR

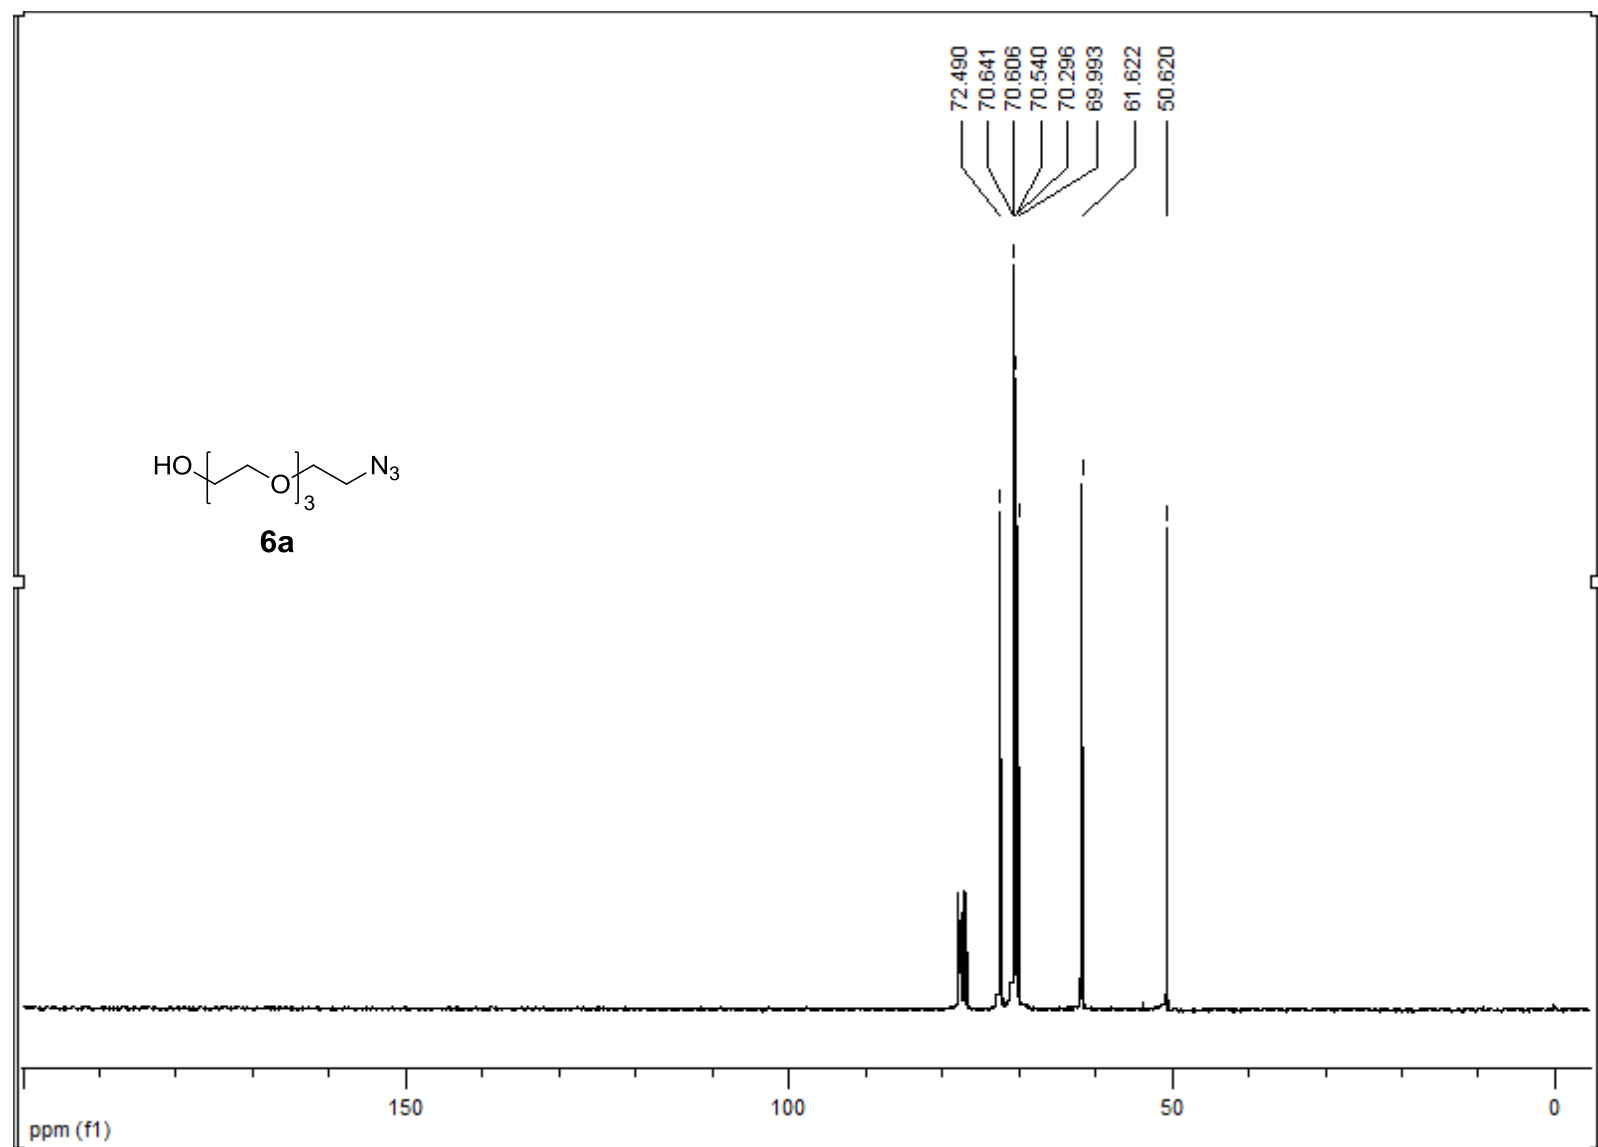

6 <sup>1</sup>H NMR

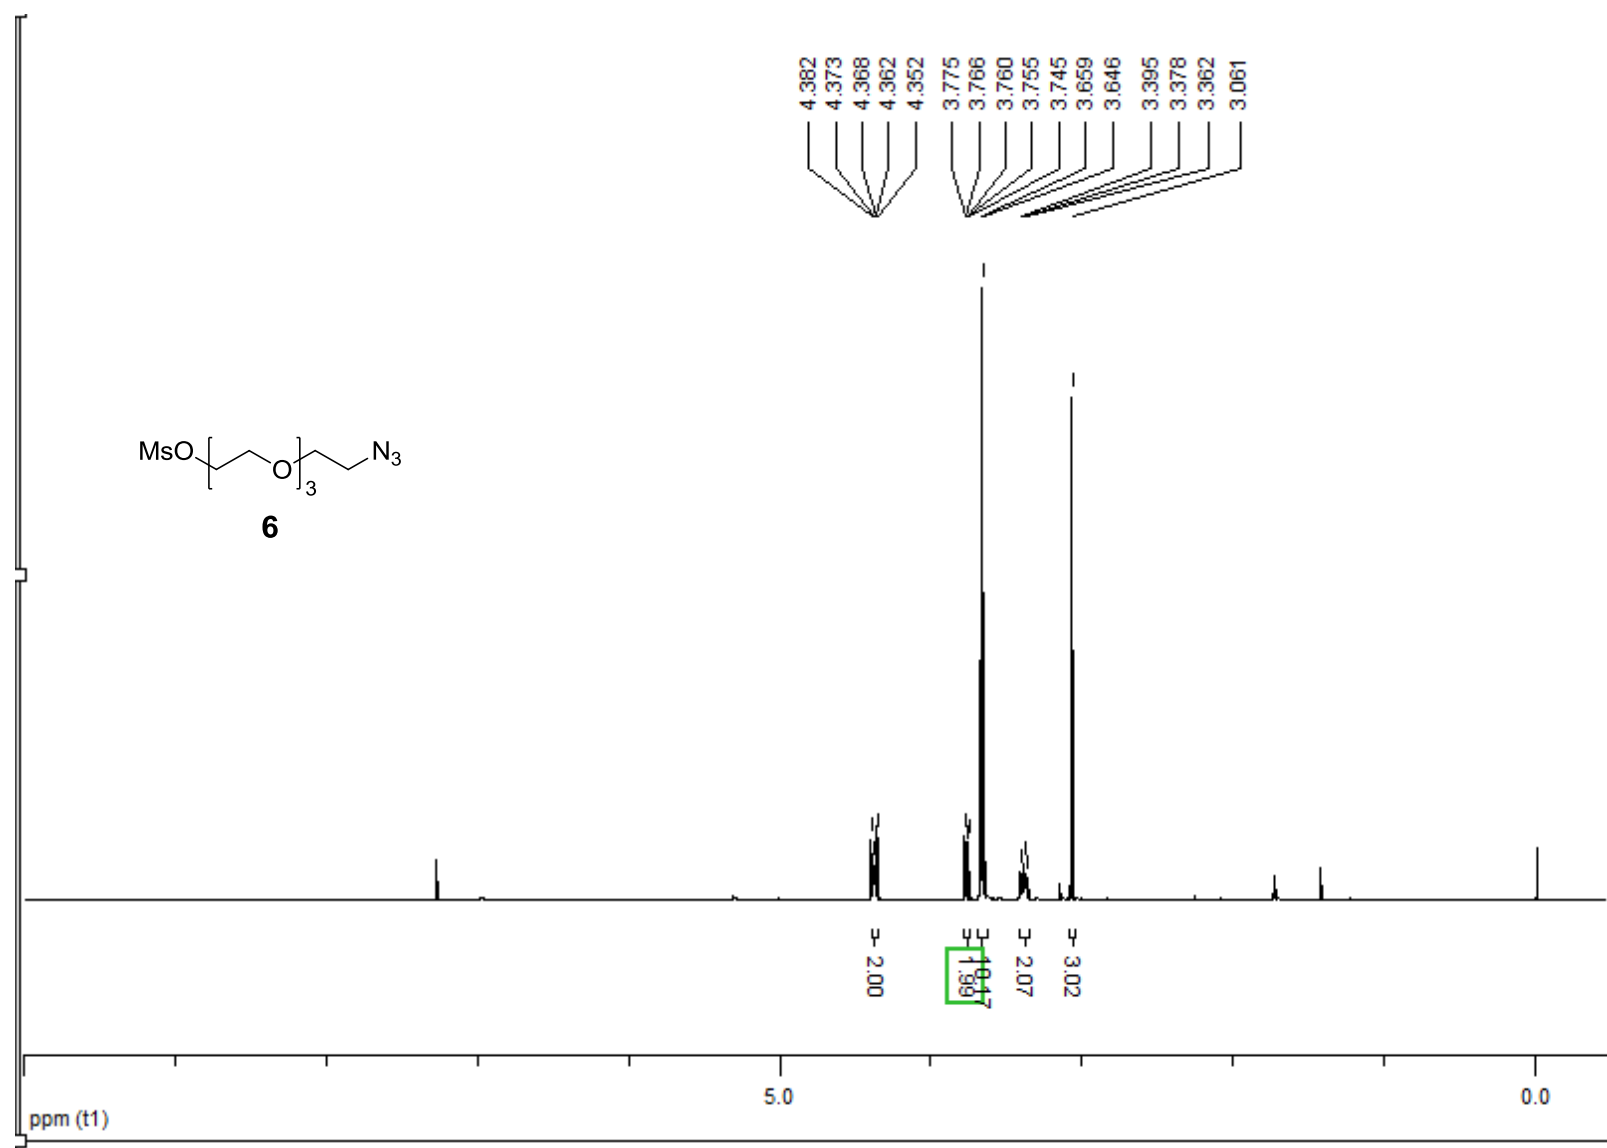

6 <sup>13</sup>C NMR

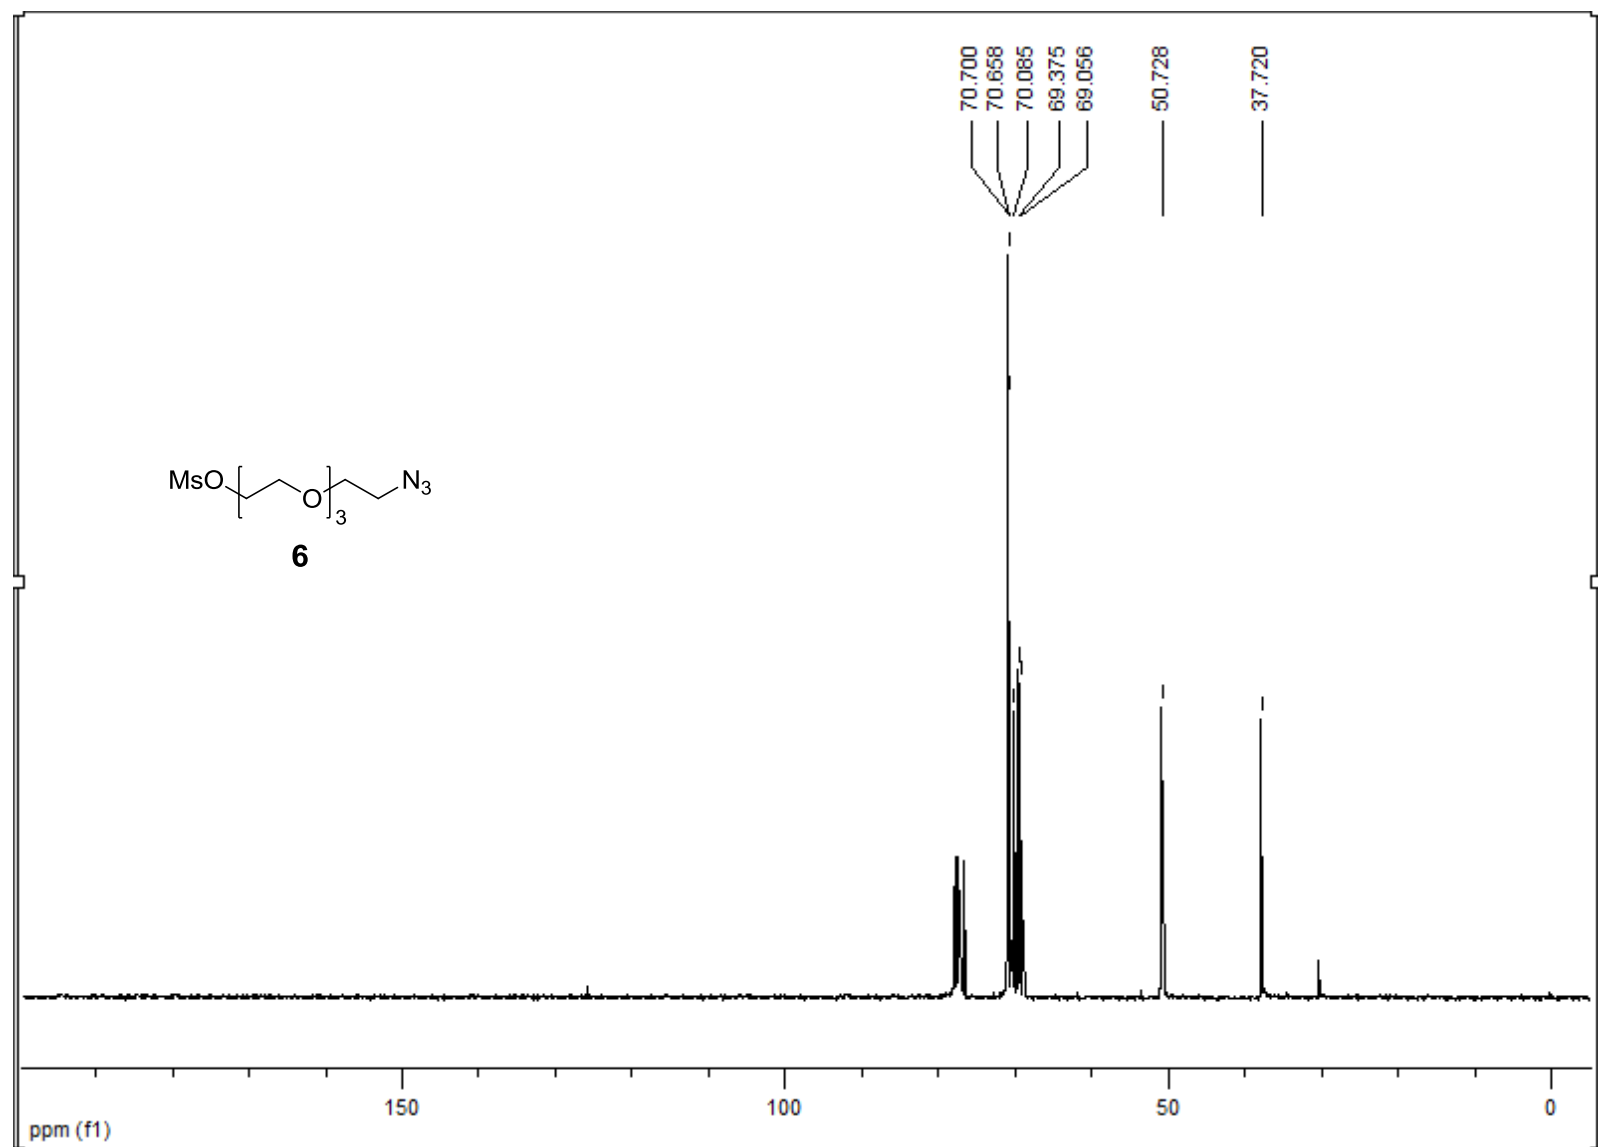

7 <sup>1</sup>H NMR

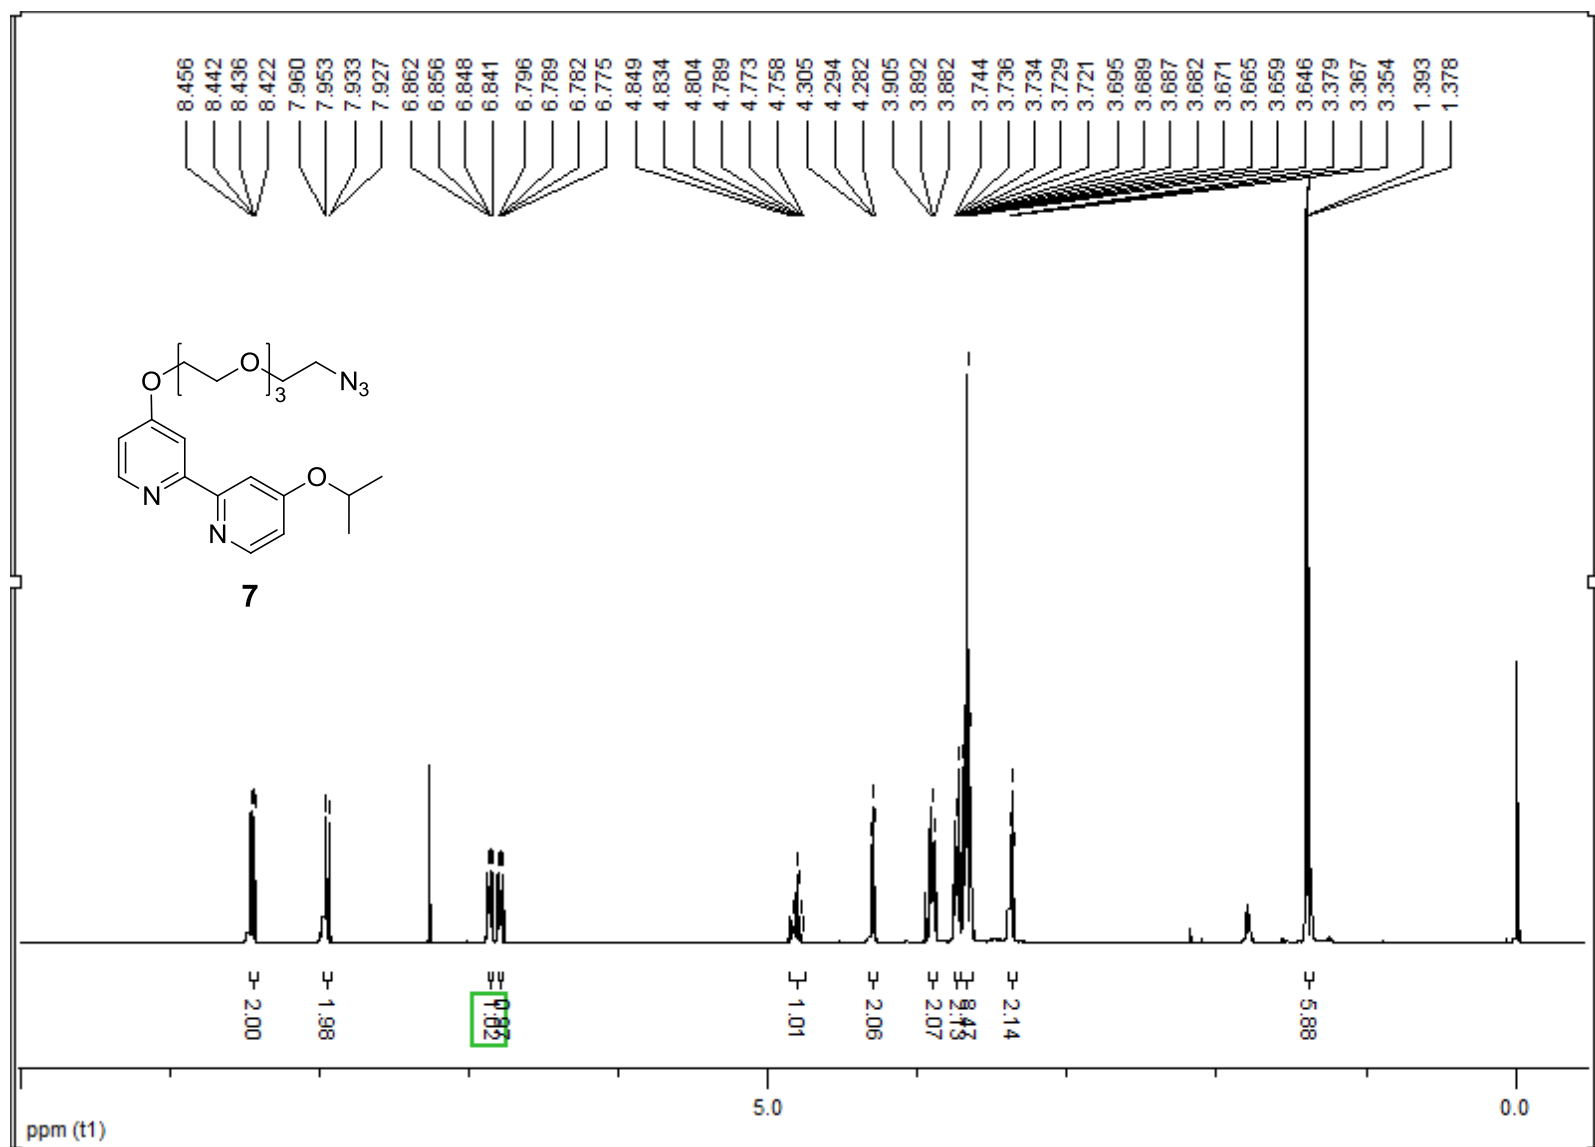

7 <sup>13</sup>C NMR

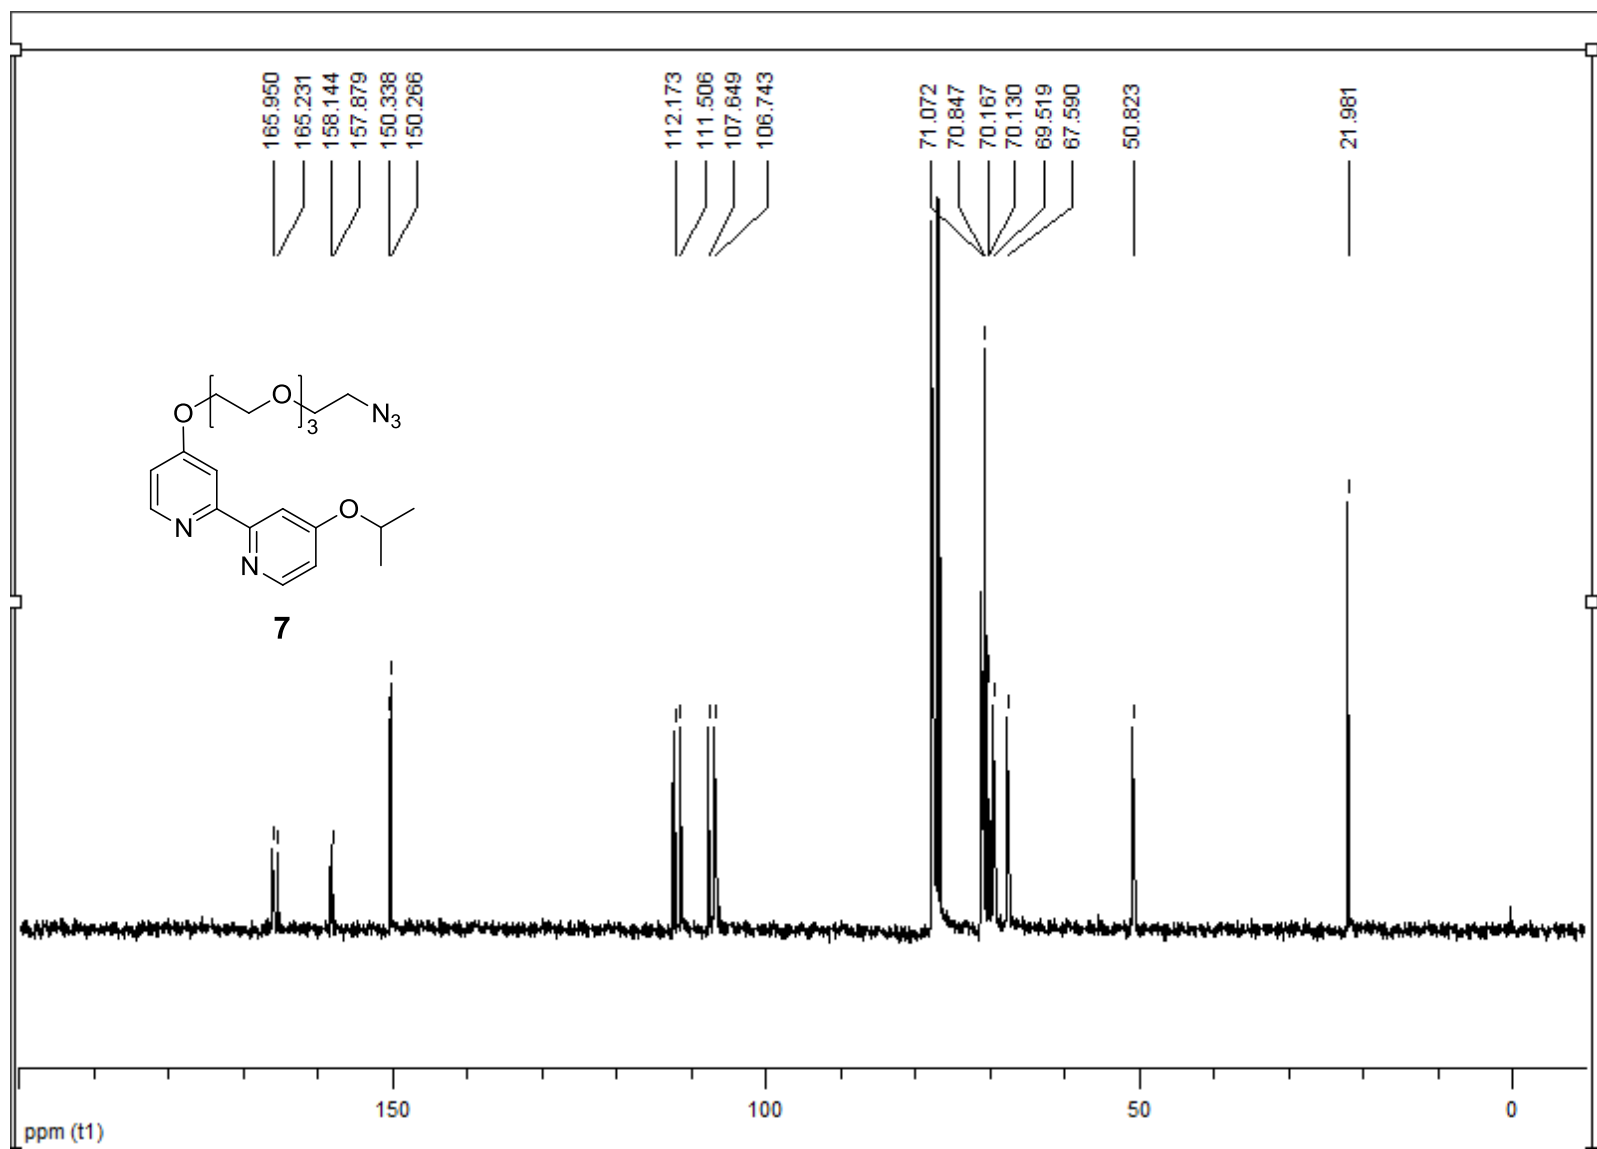

8 <sup>1</sup>H NMR

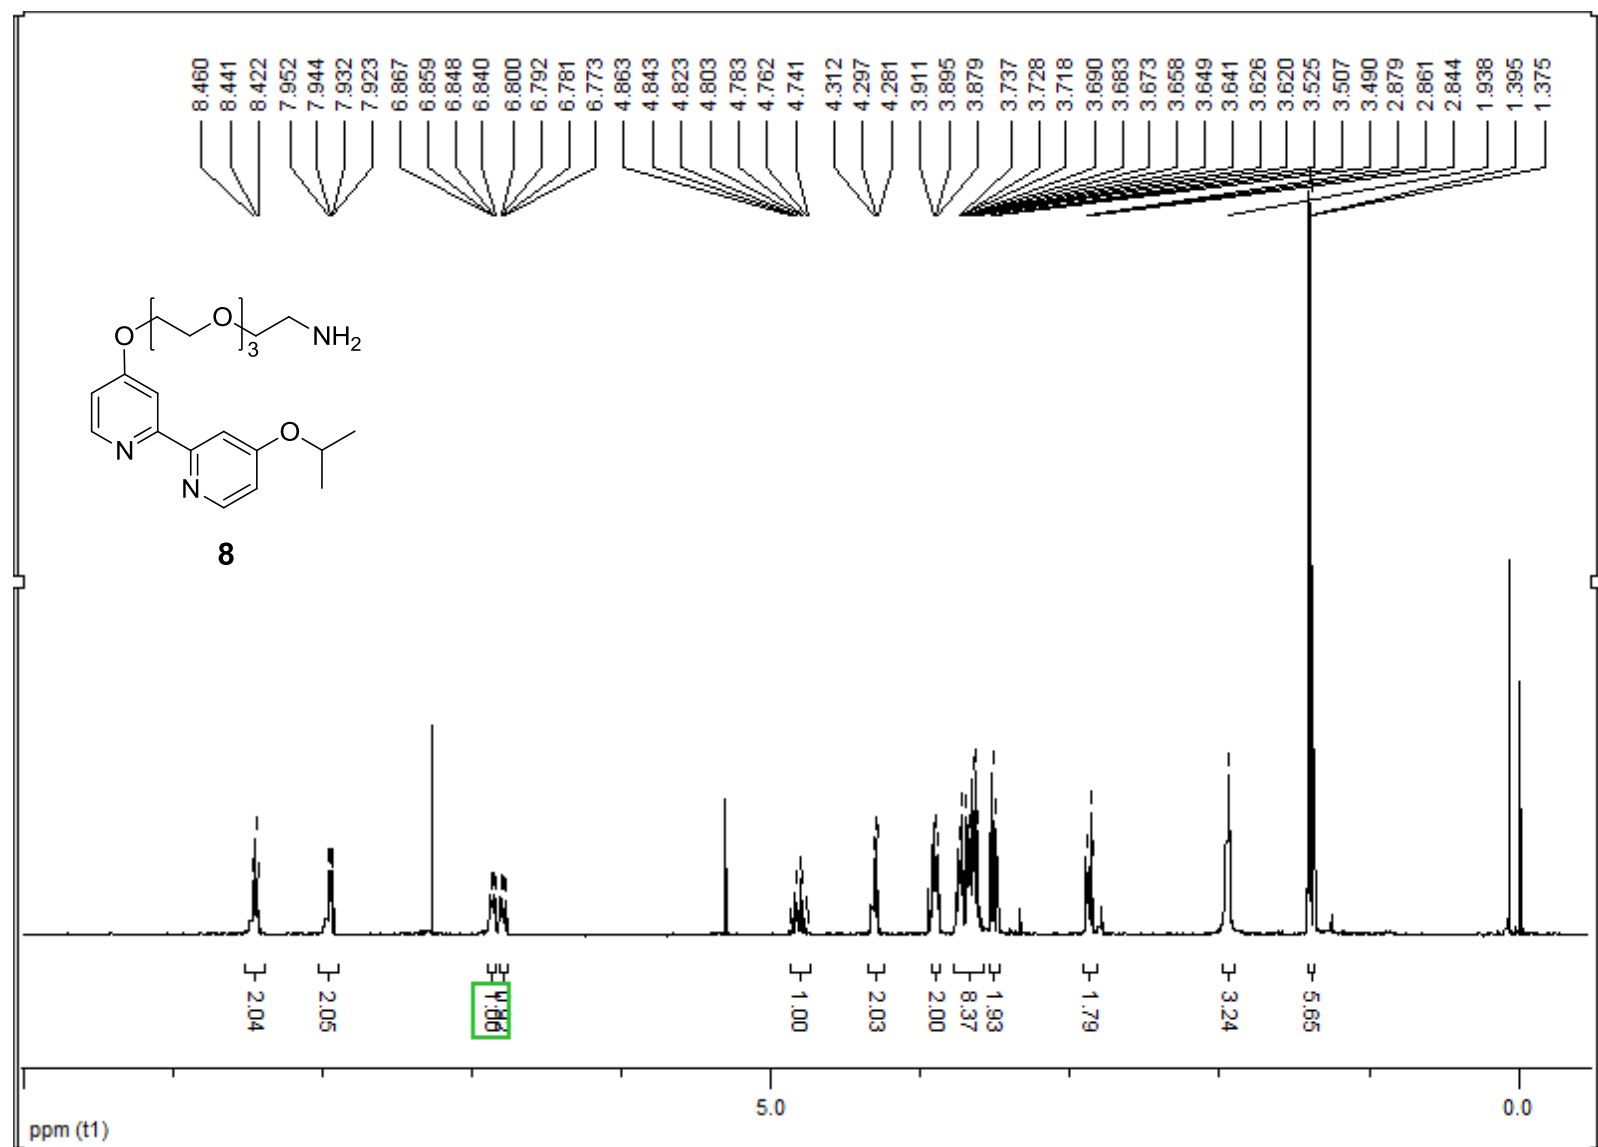



8 <sup>13</sup>C NMR

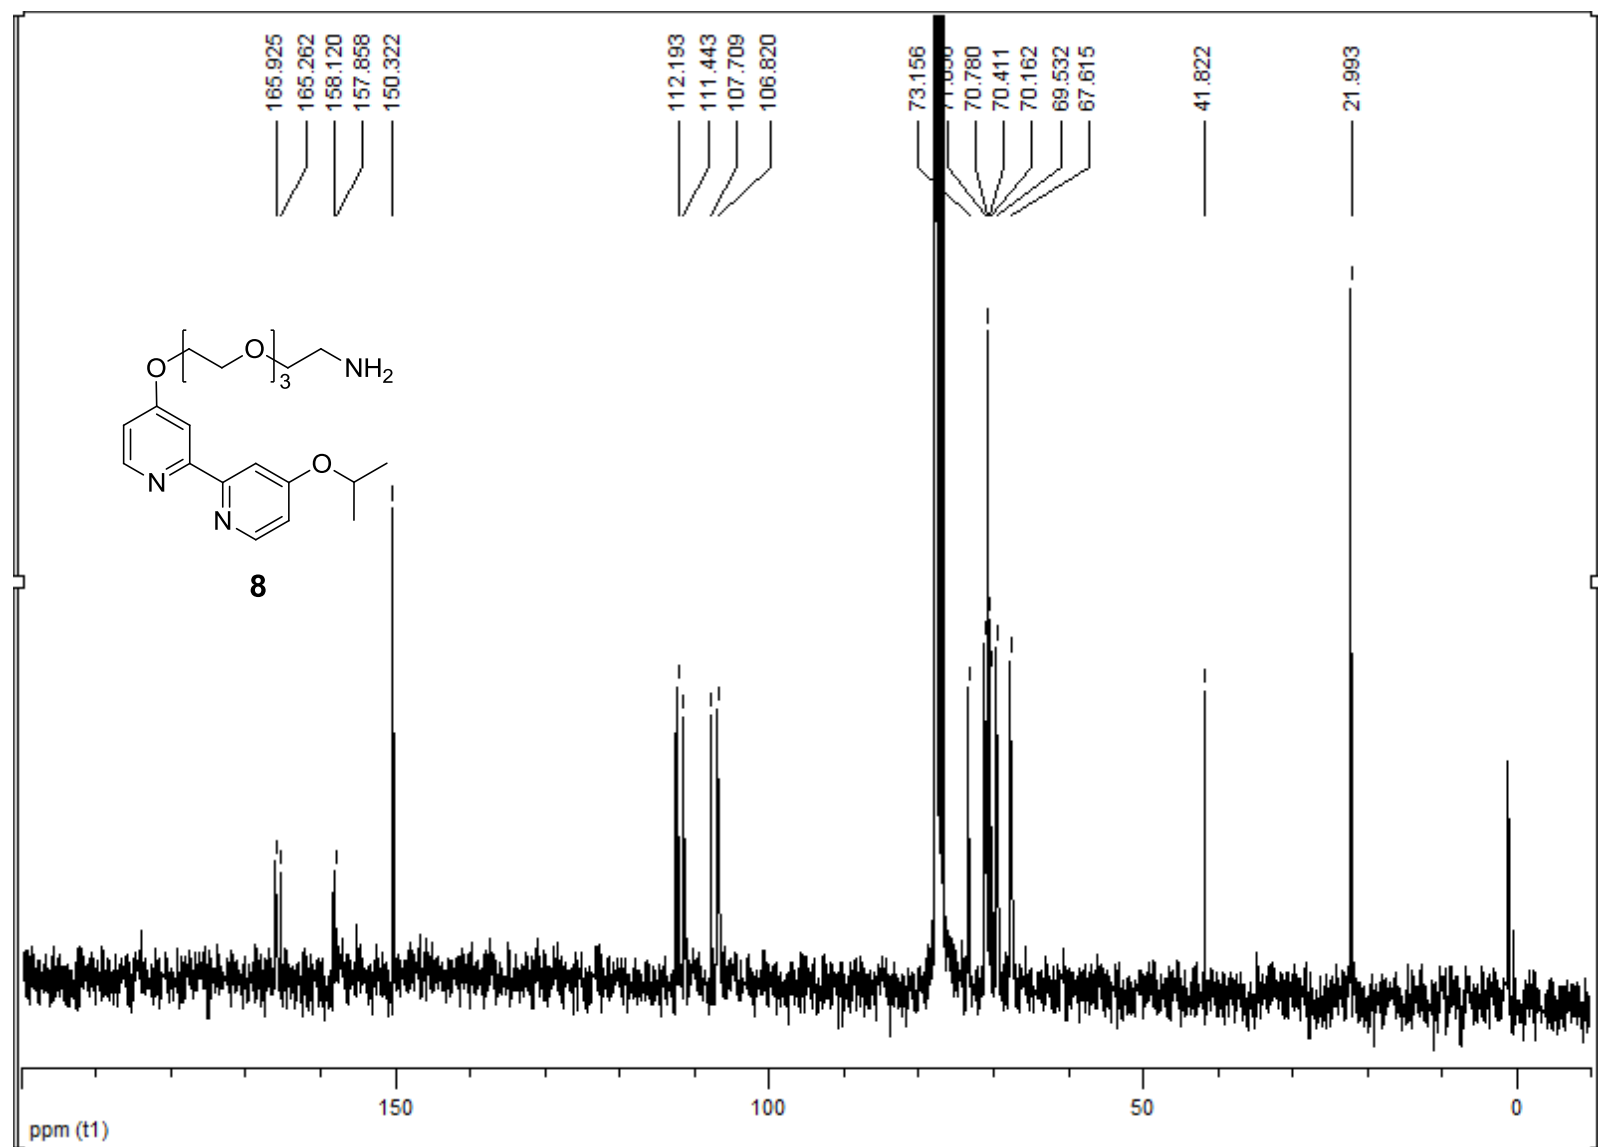

11 <sup>1</sup>H NMR

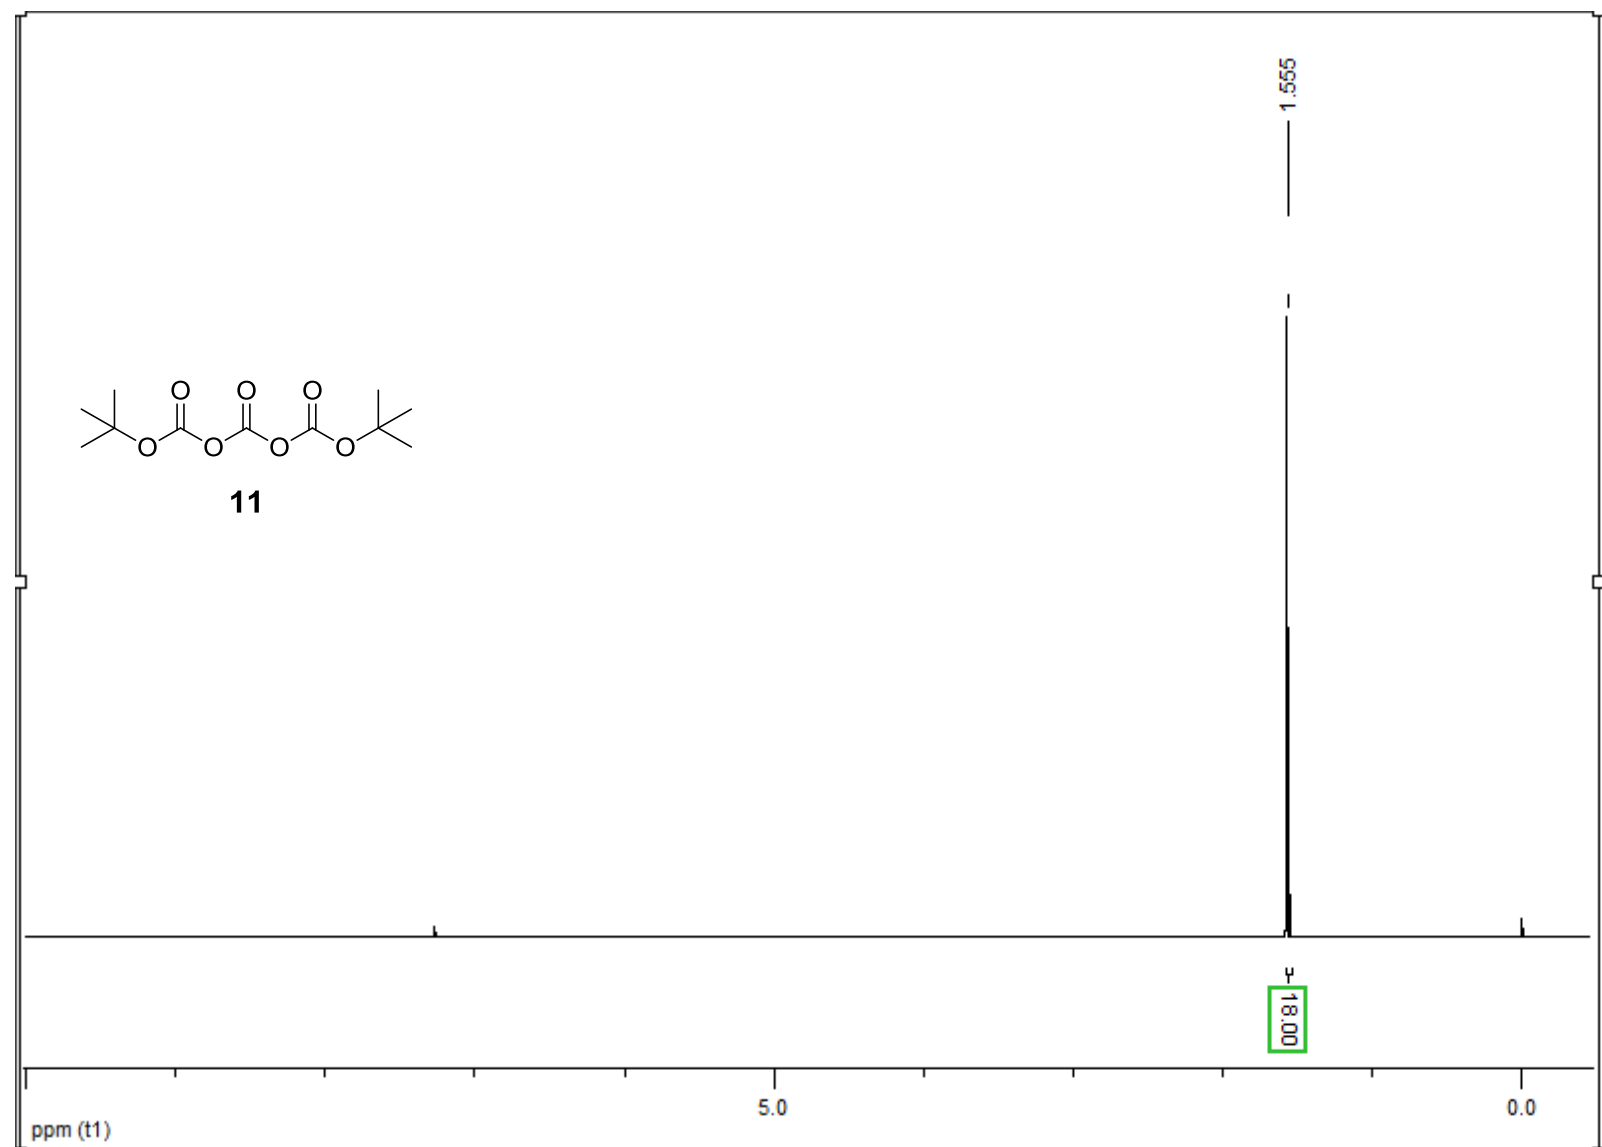

11 <sup>13</sup>C NMR

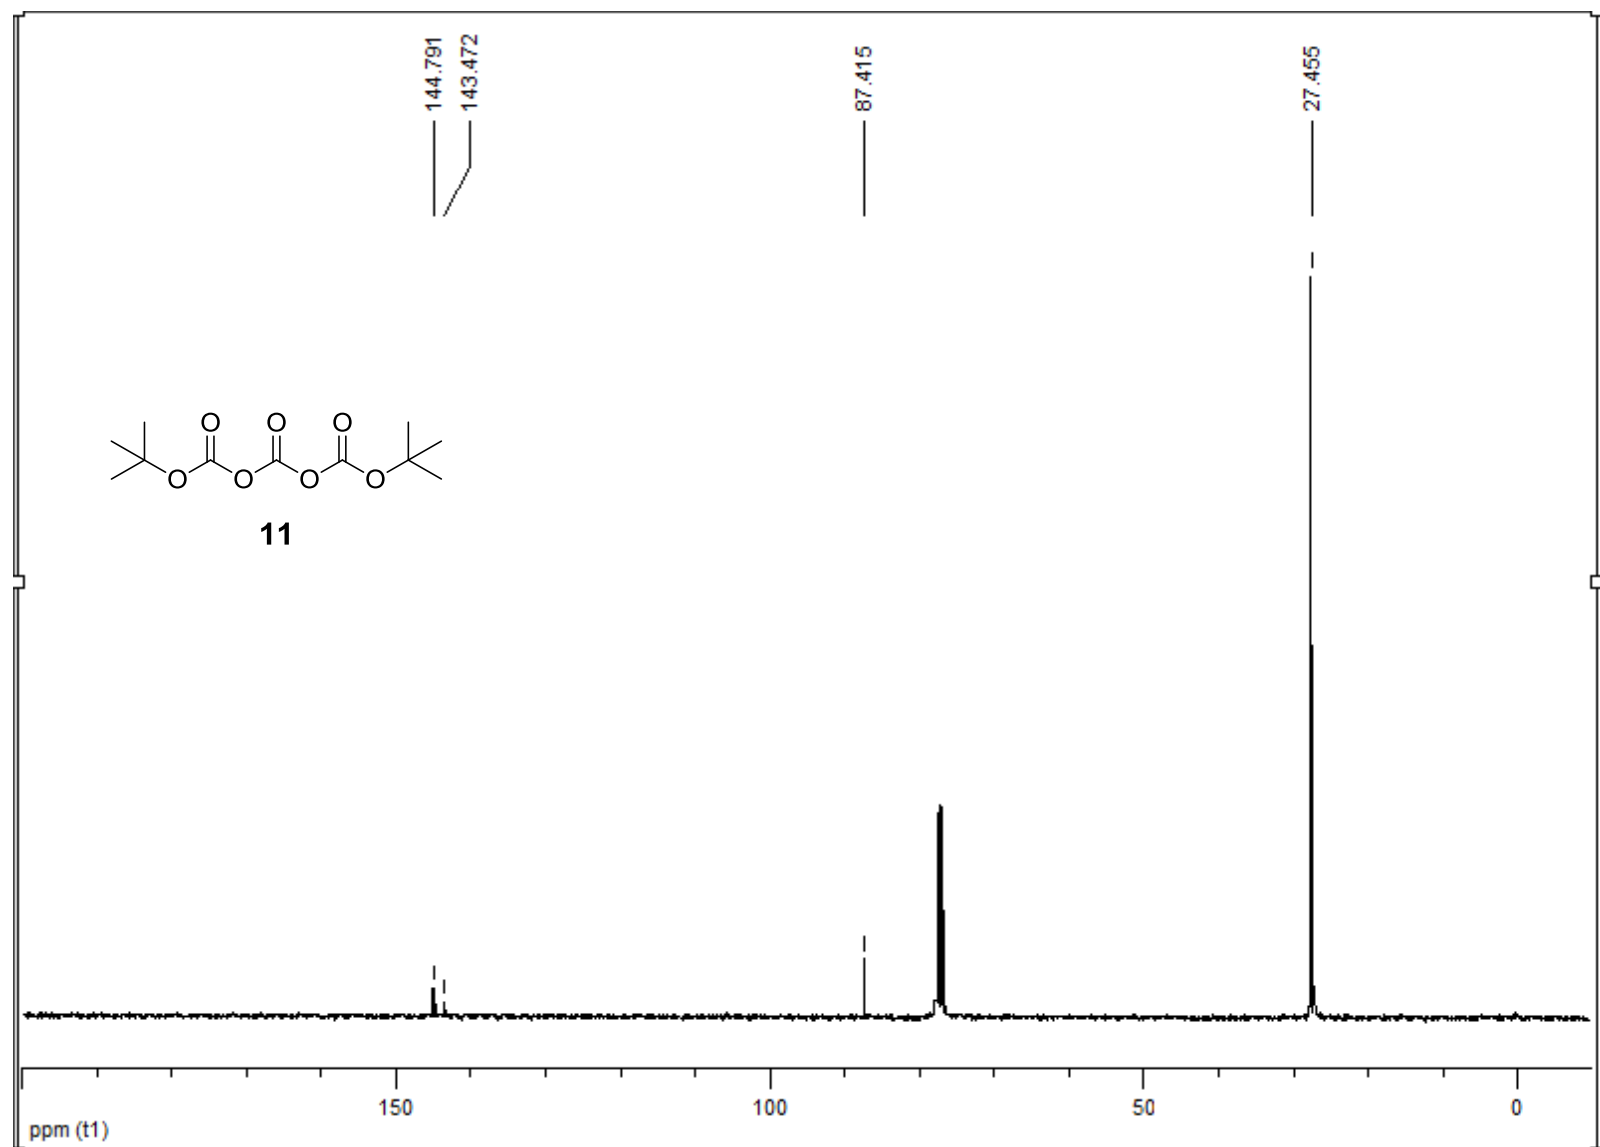

12 <sup>1</sup>H NMR

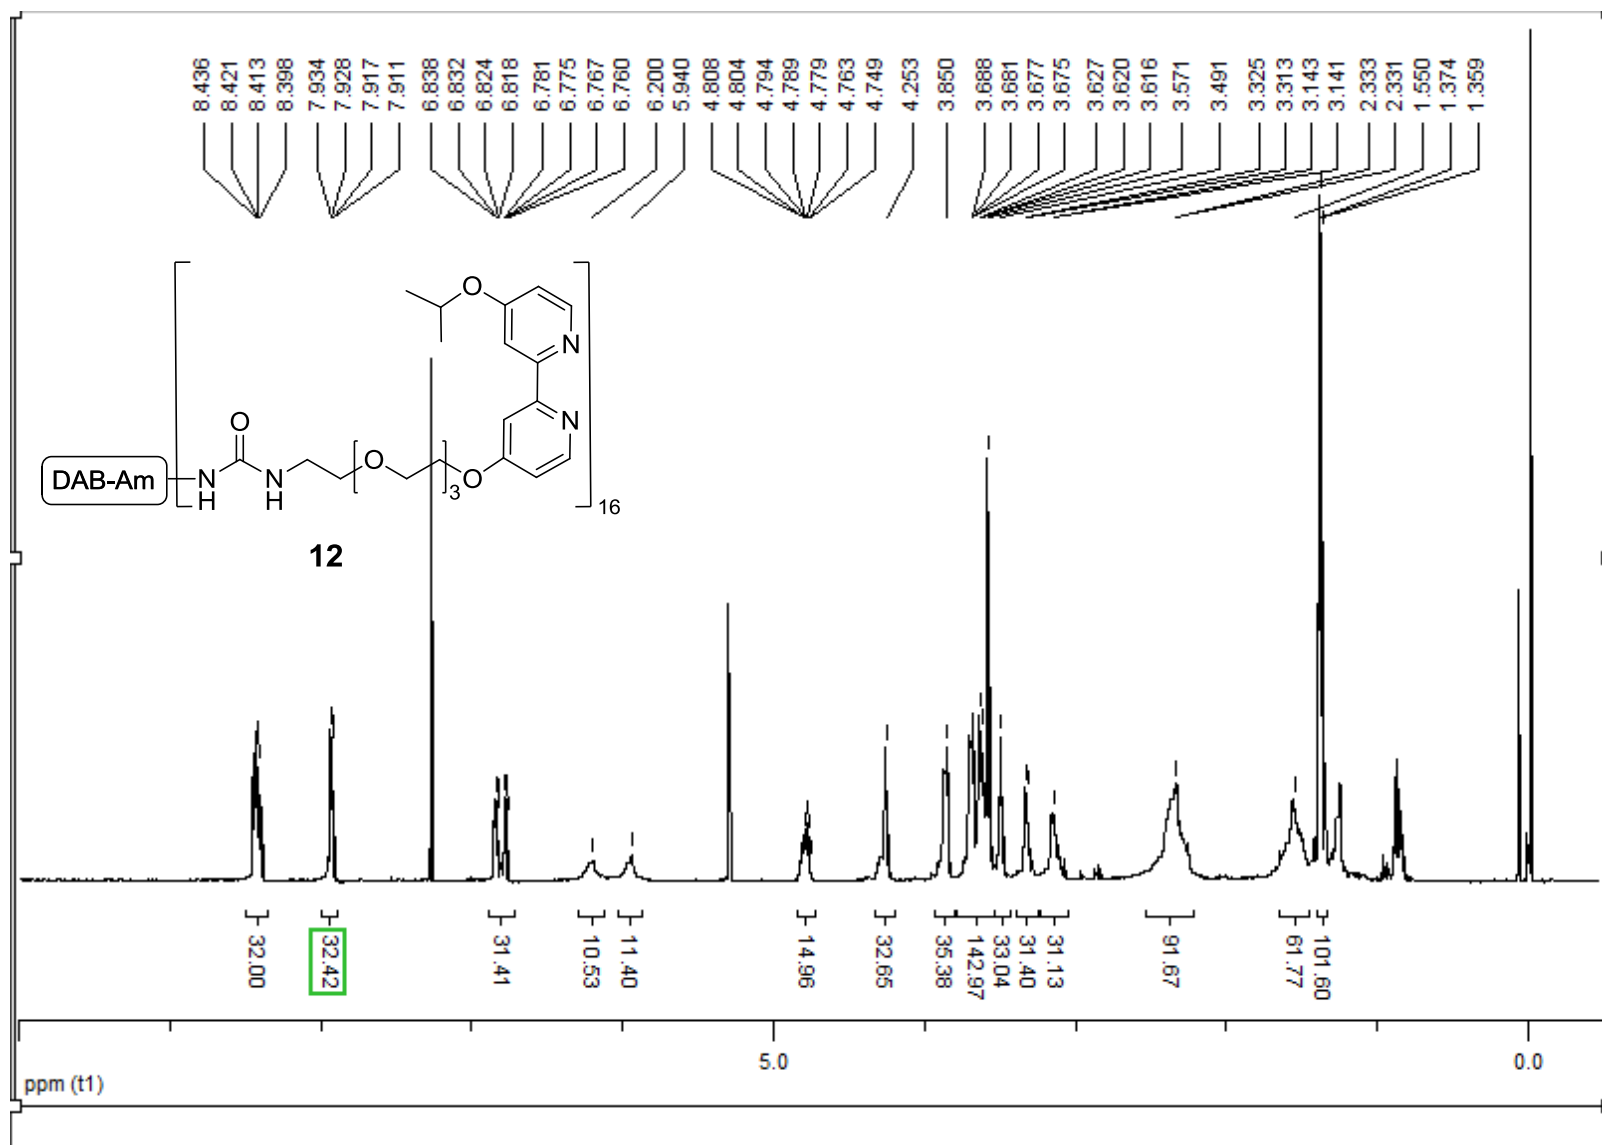

12 <sup>13</sup>C NMR

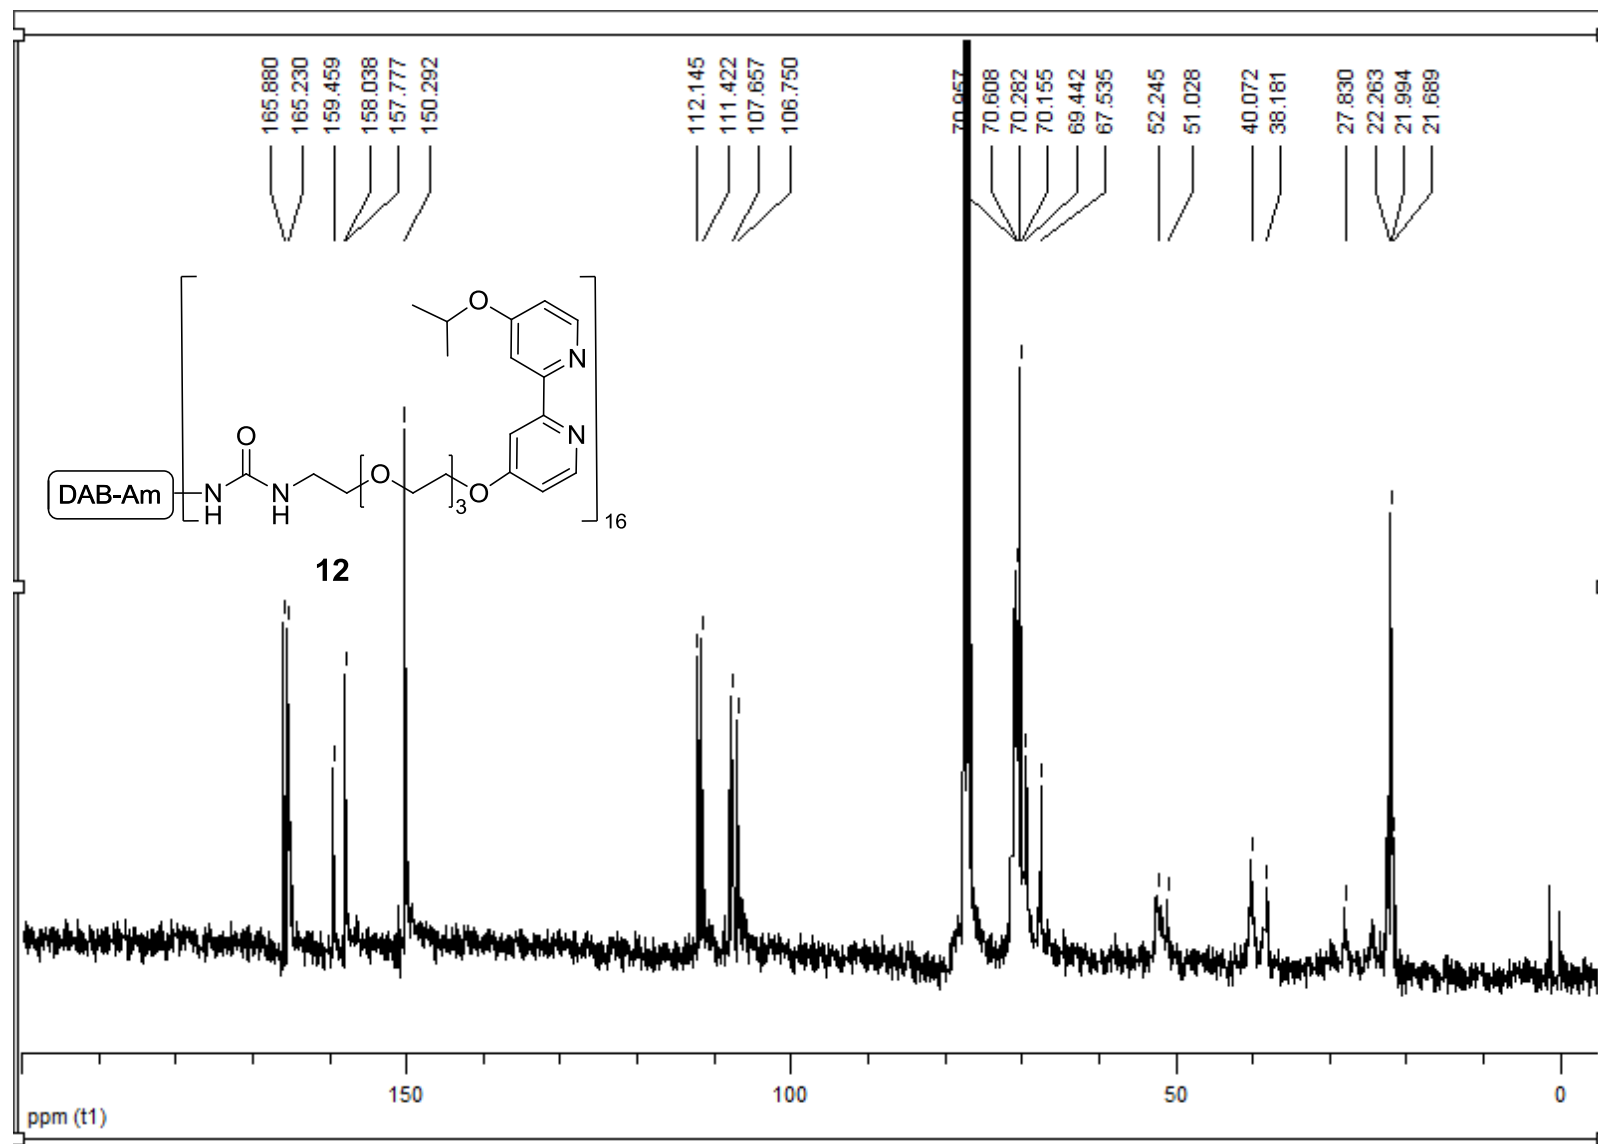

13 <sup>1</sup>H NMR

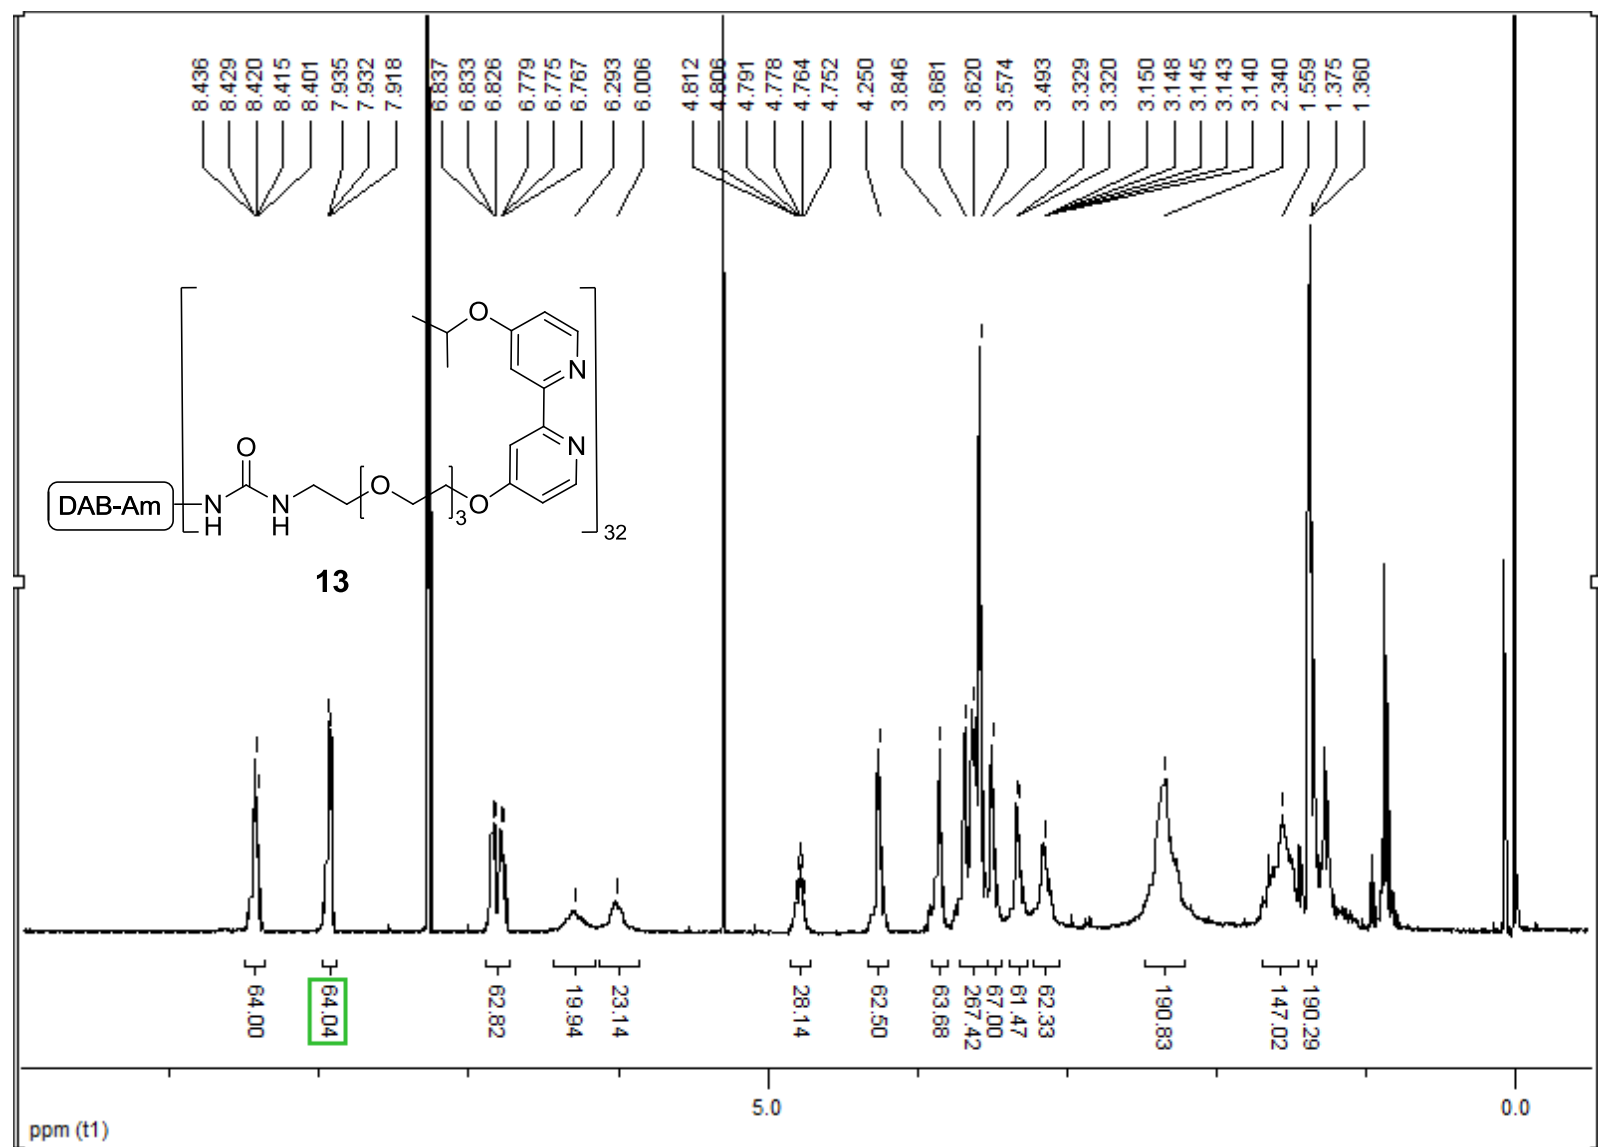

13 <sup>13</sup>C NMR

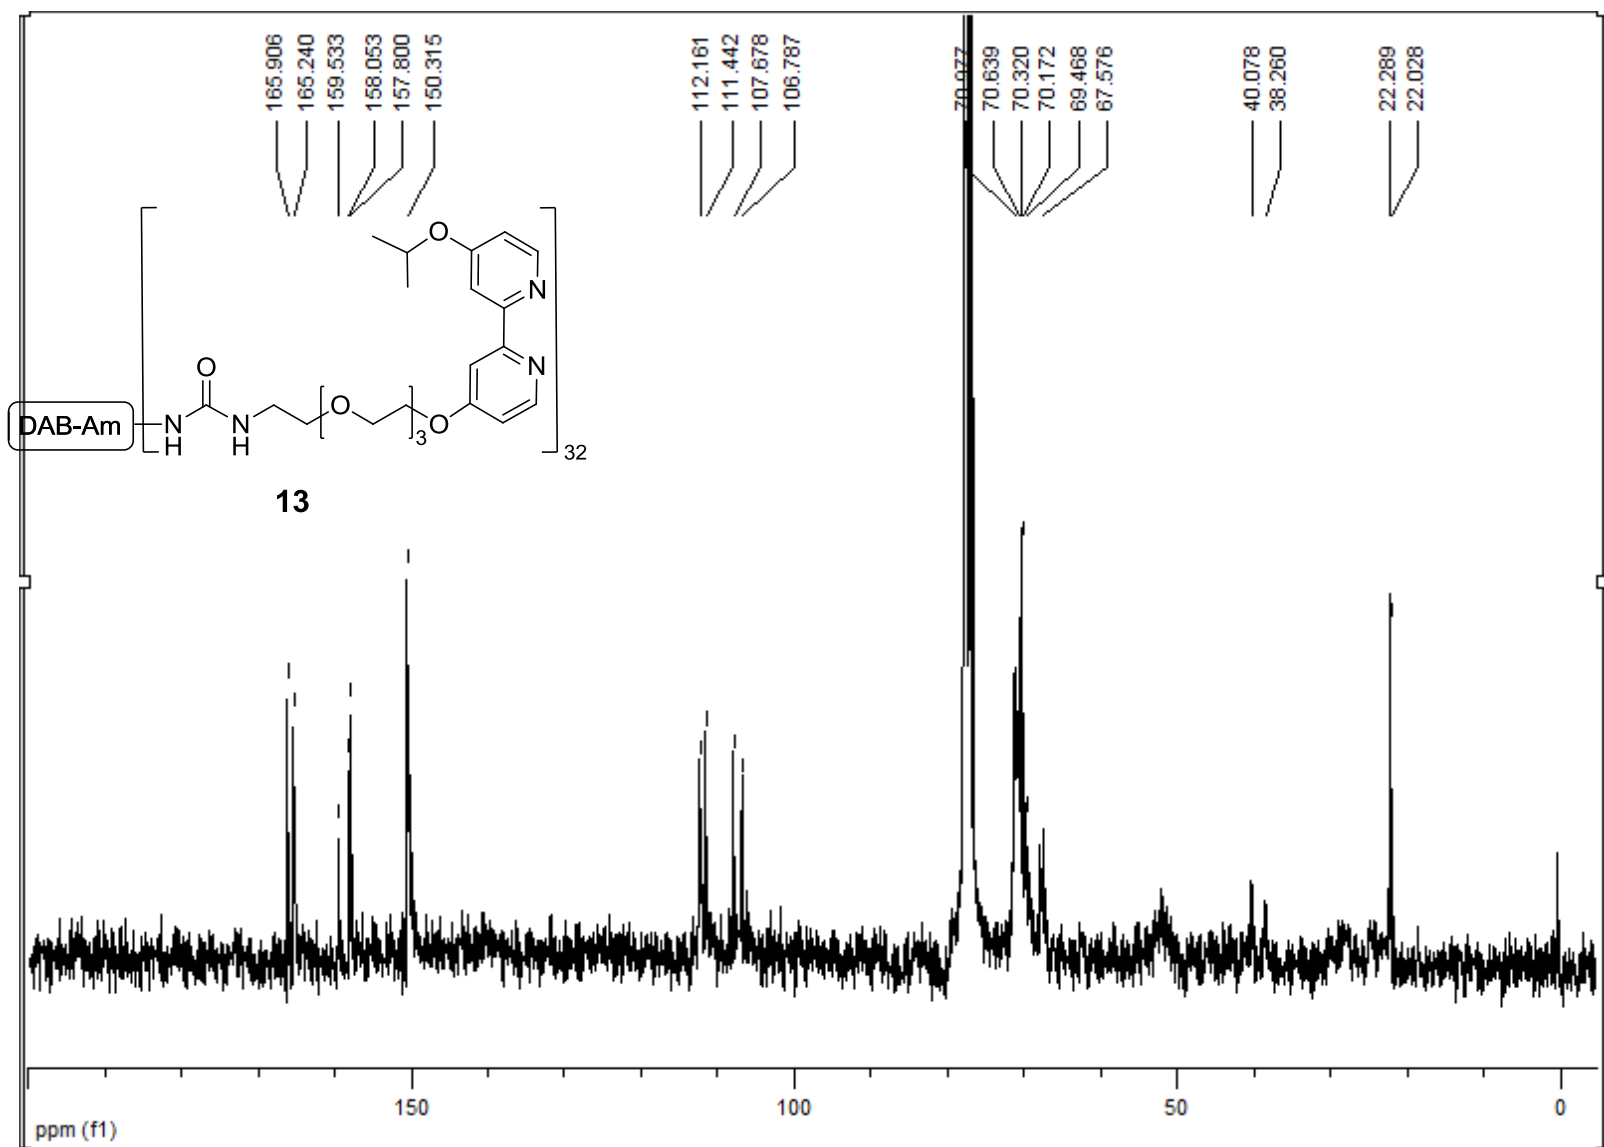

14 <sup>1</sup>H NMR

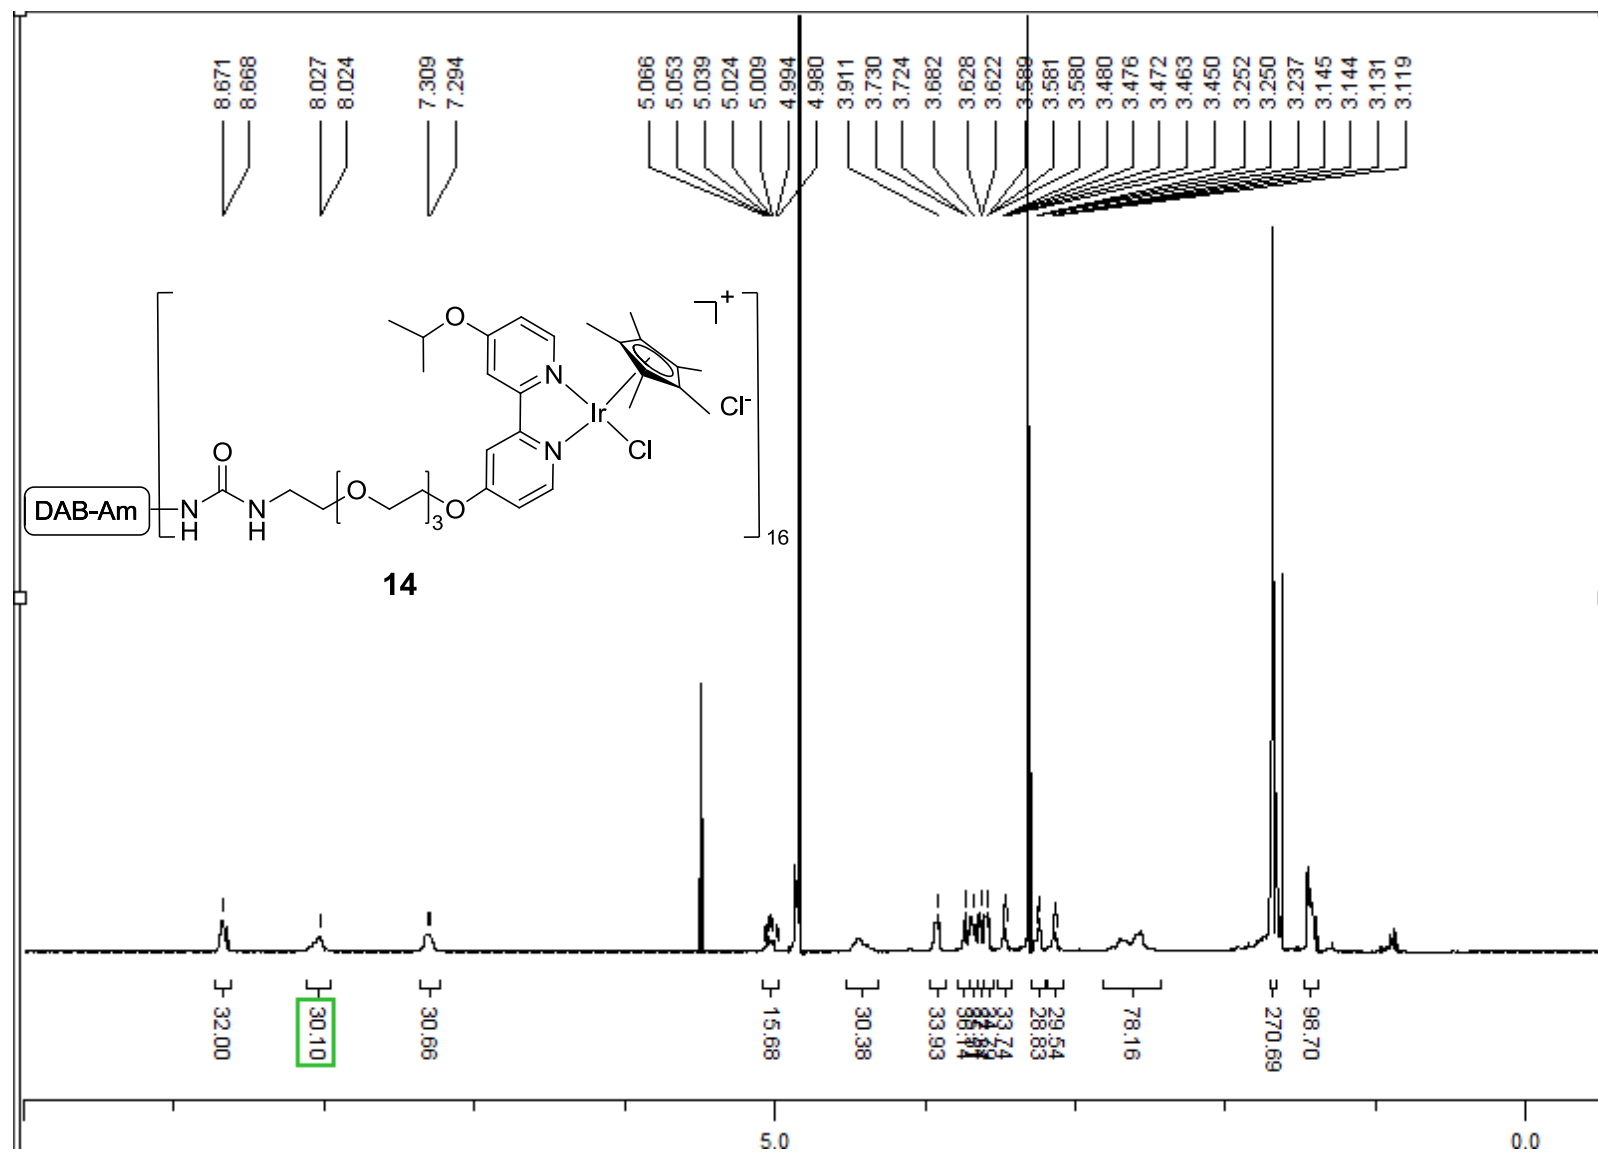



14 <sup>13</sup>C NMR

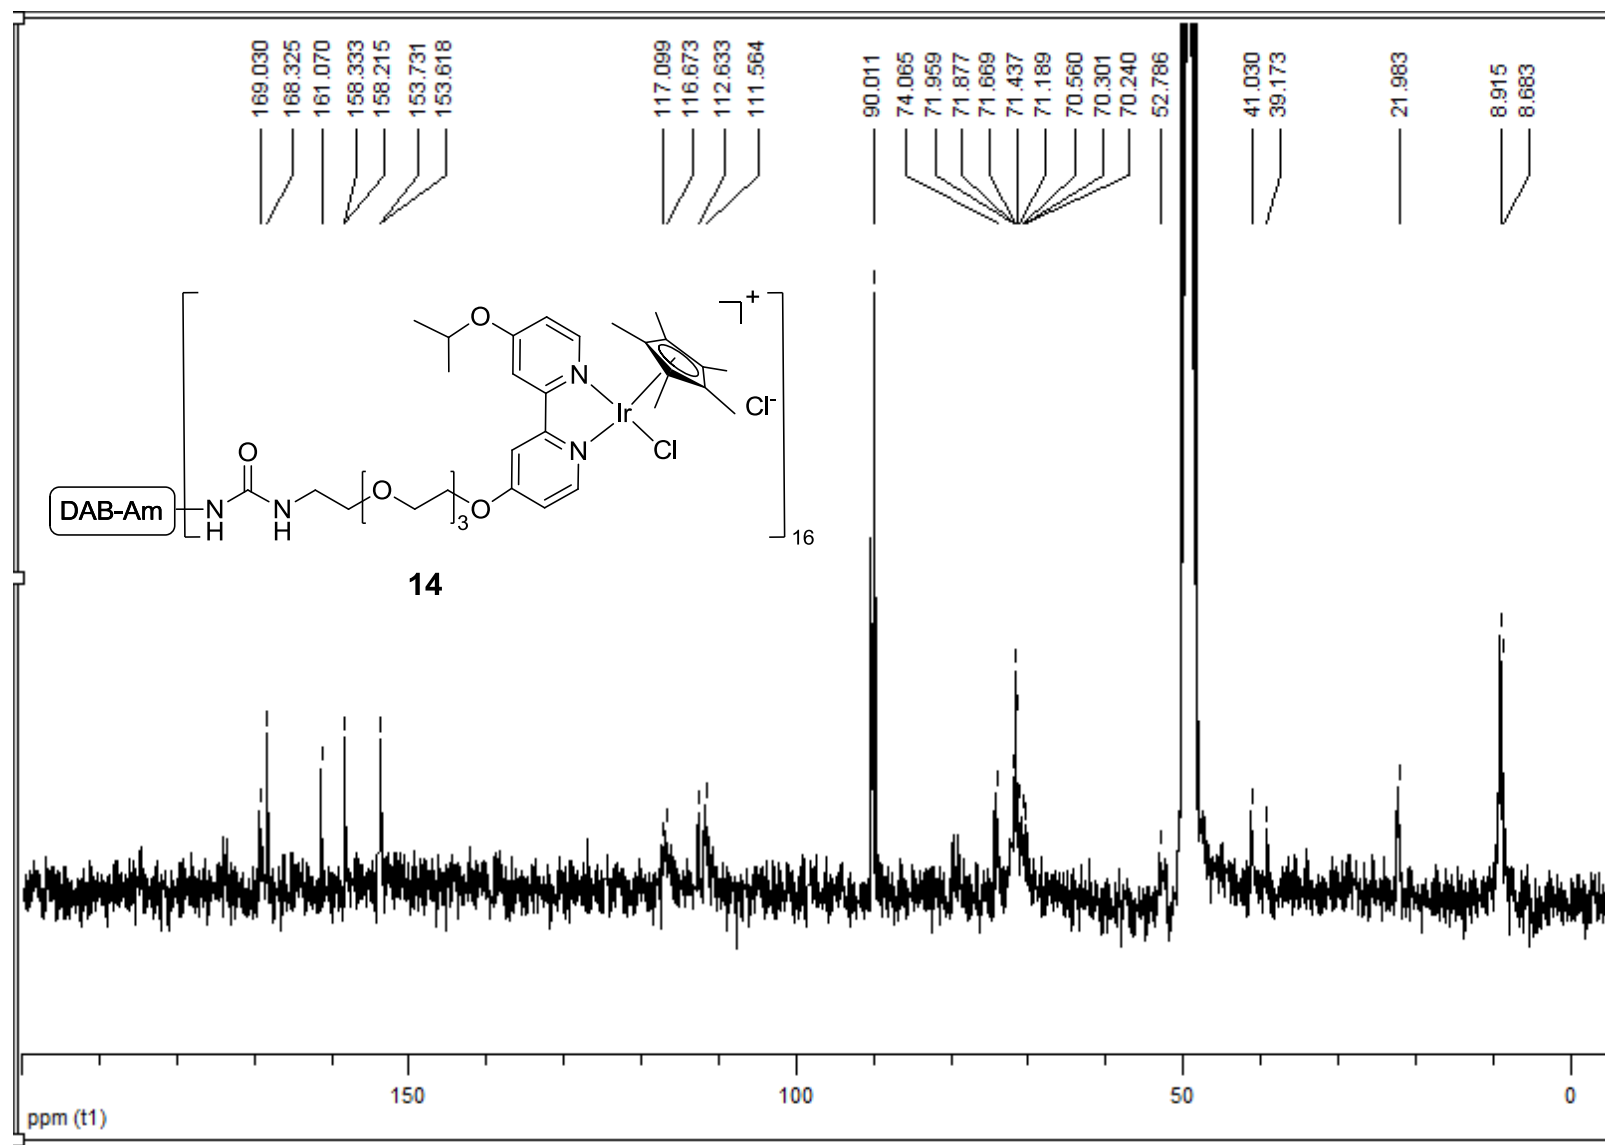

15 <sup>1</sup>H NMR

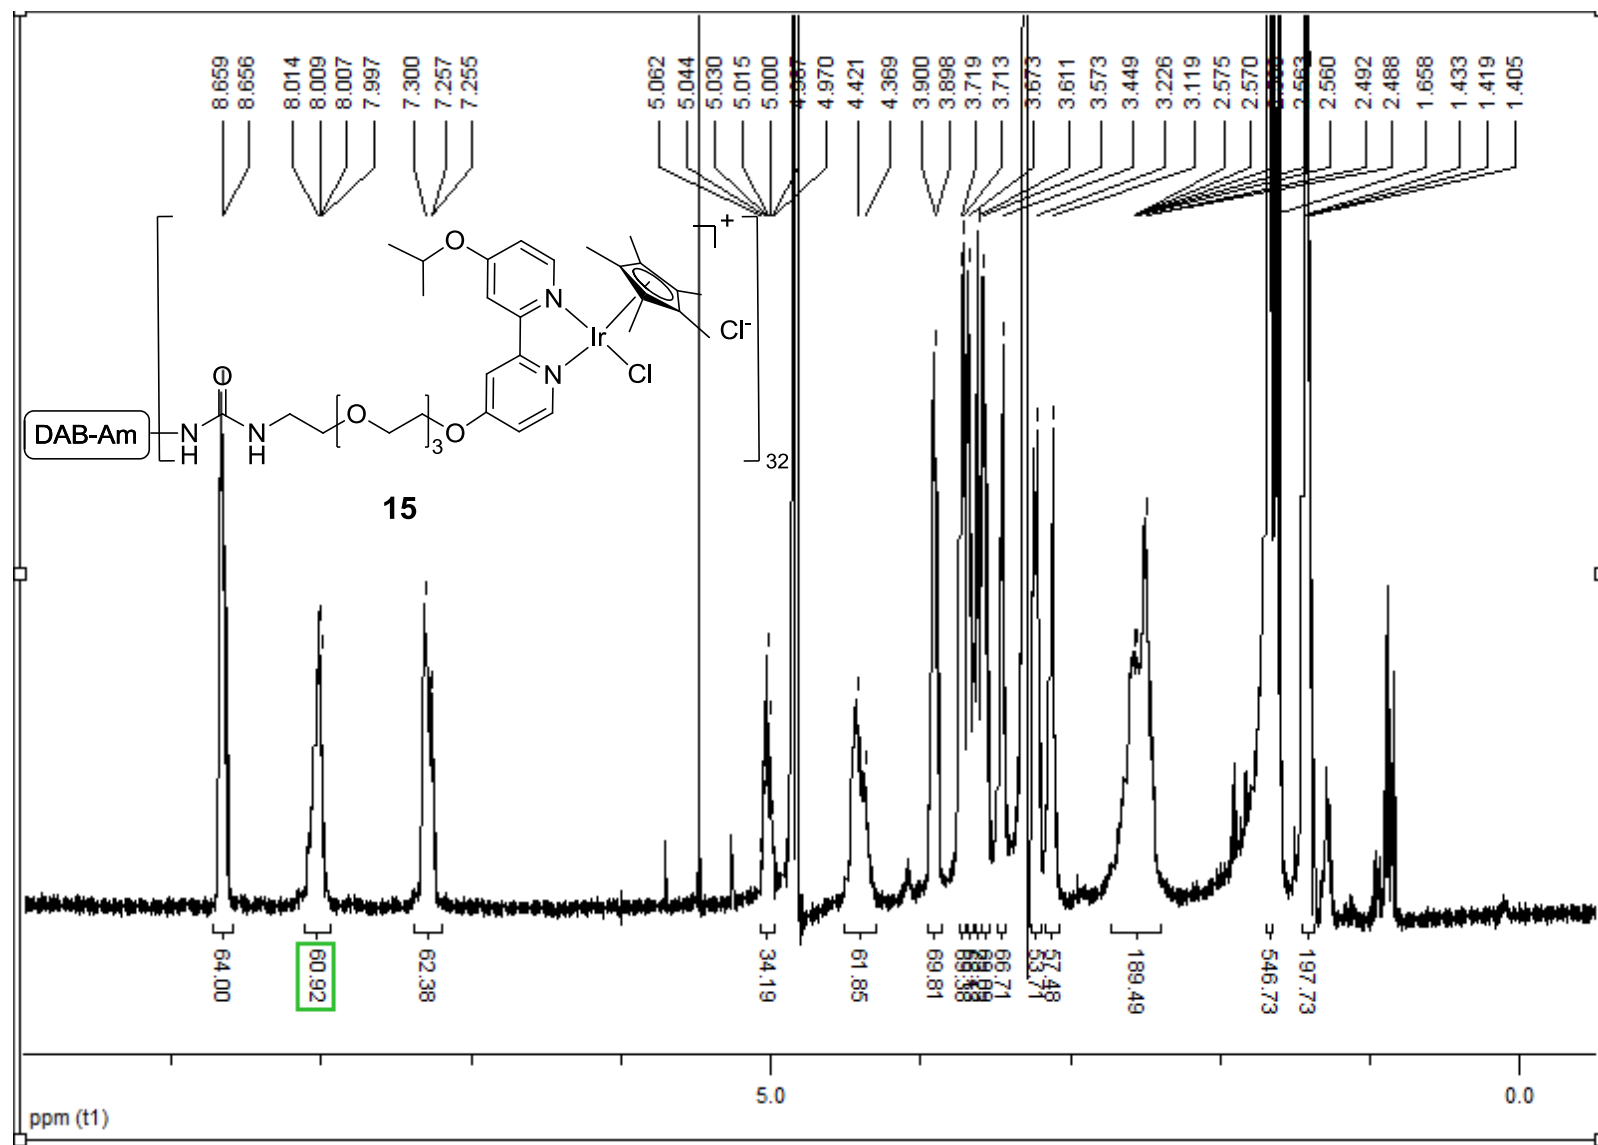

15 <sup>13</sup>C NMR

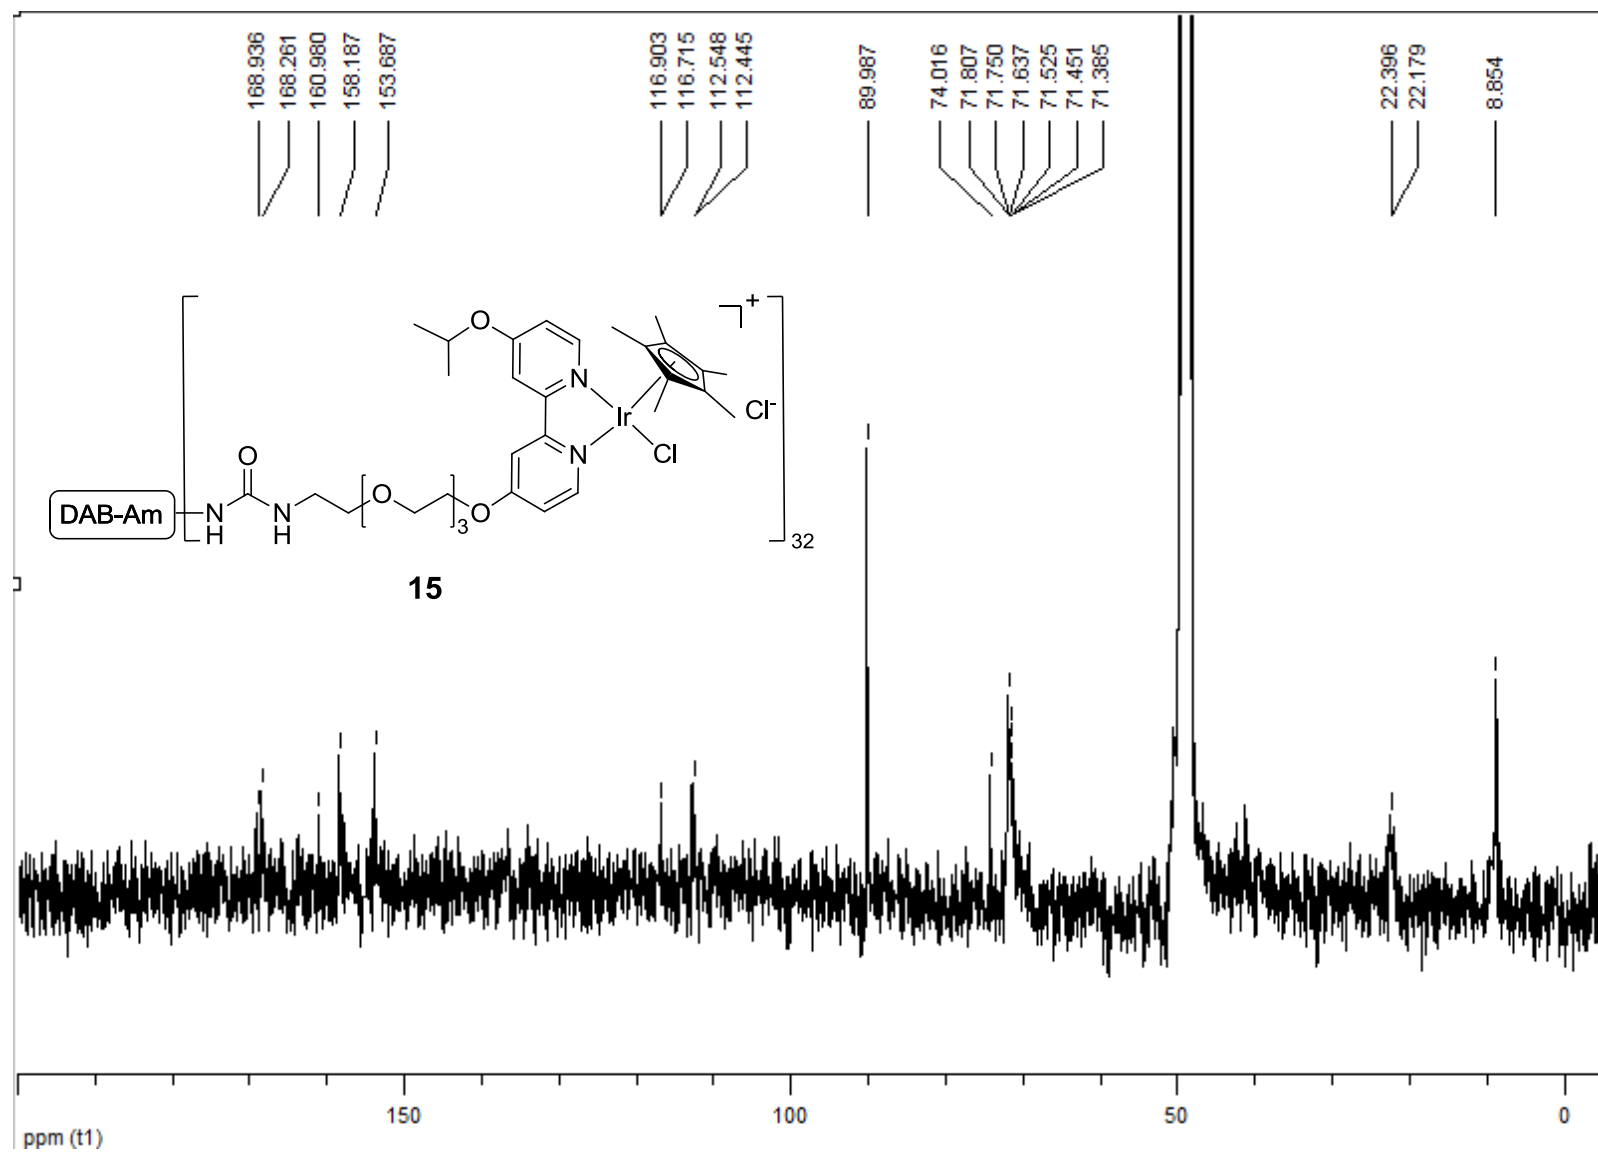

16 <sup>1</sup>H NMR

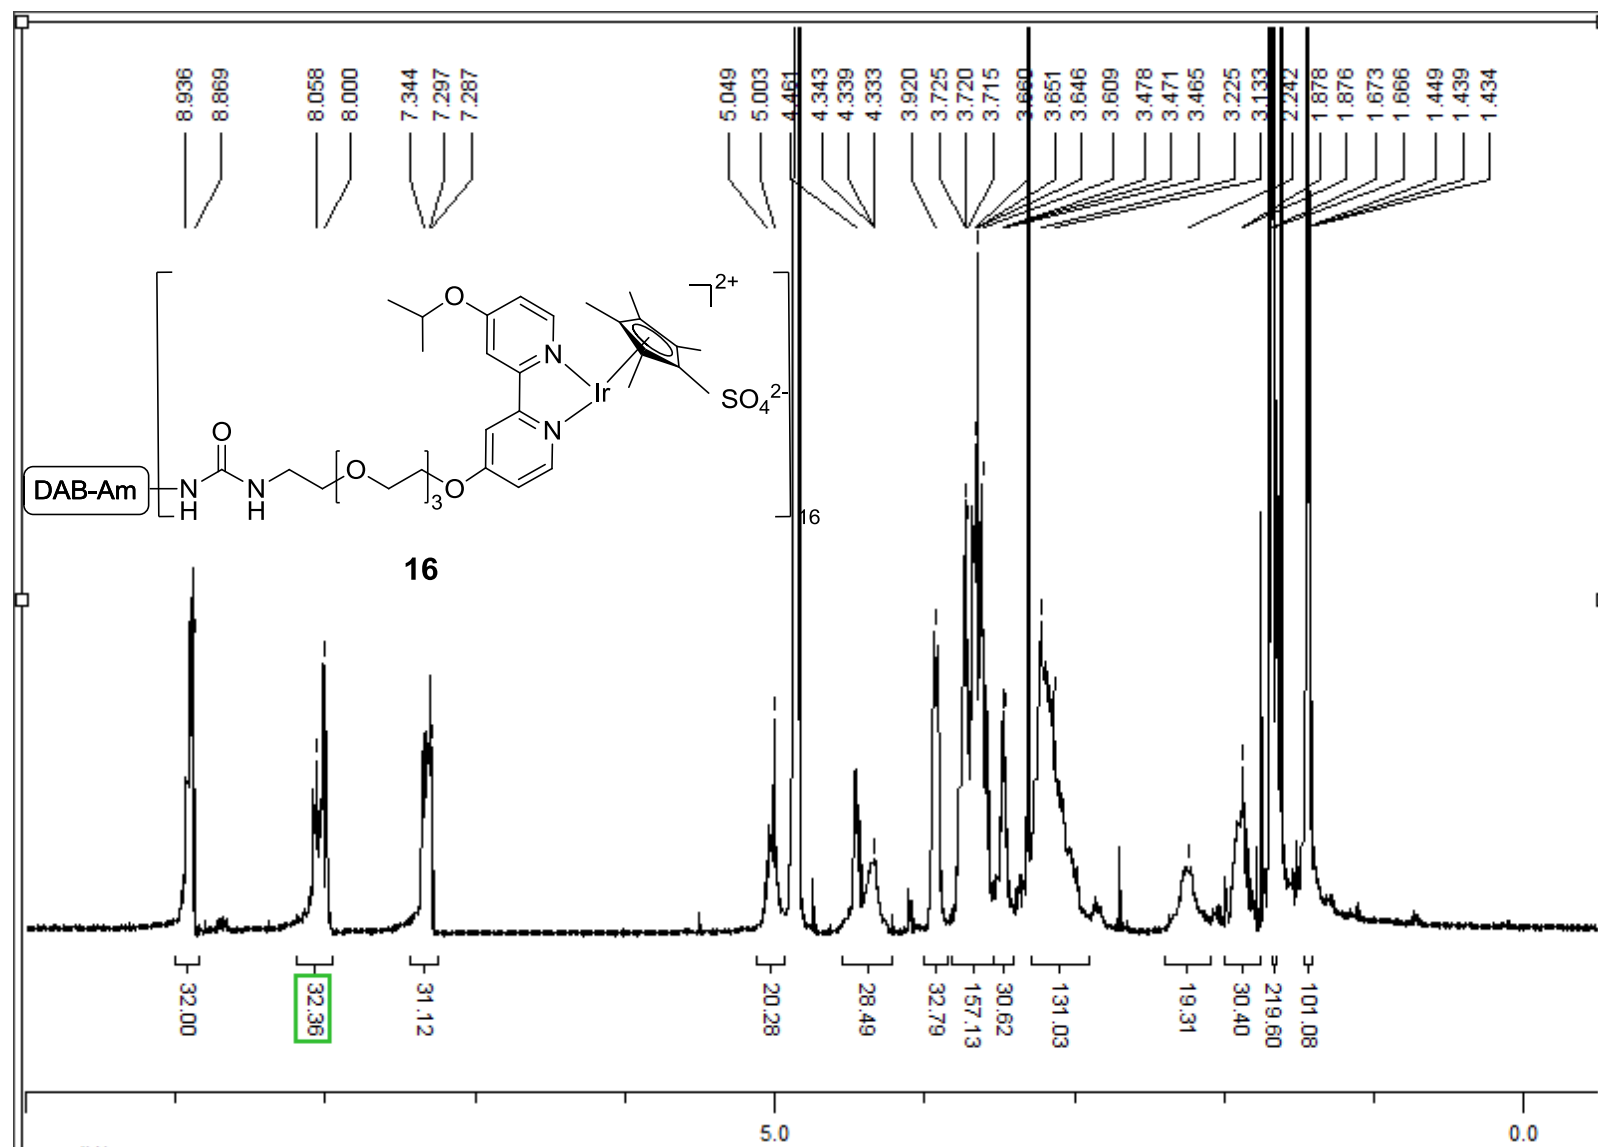

16 <sup>13</sup>C NMR

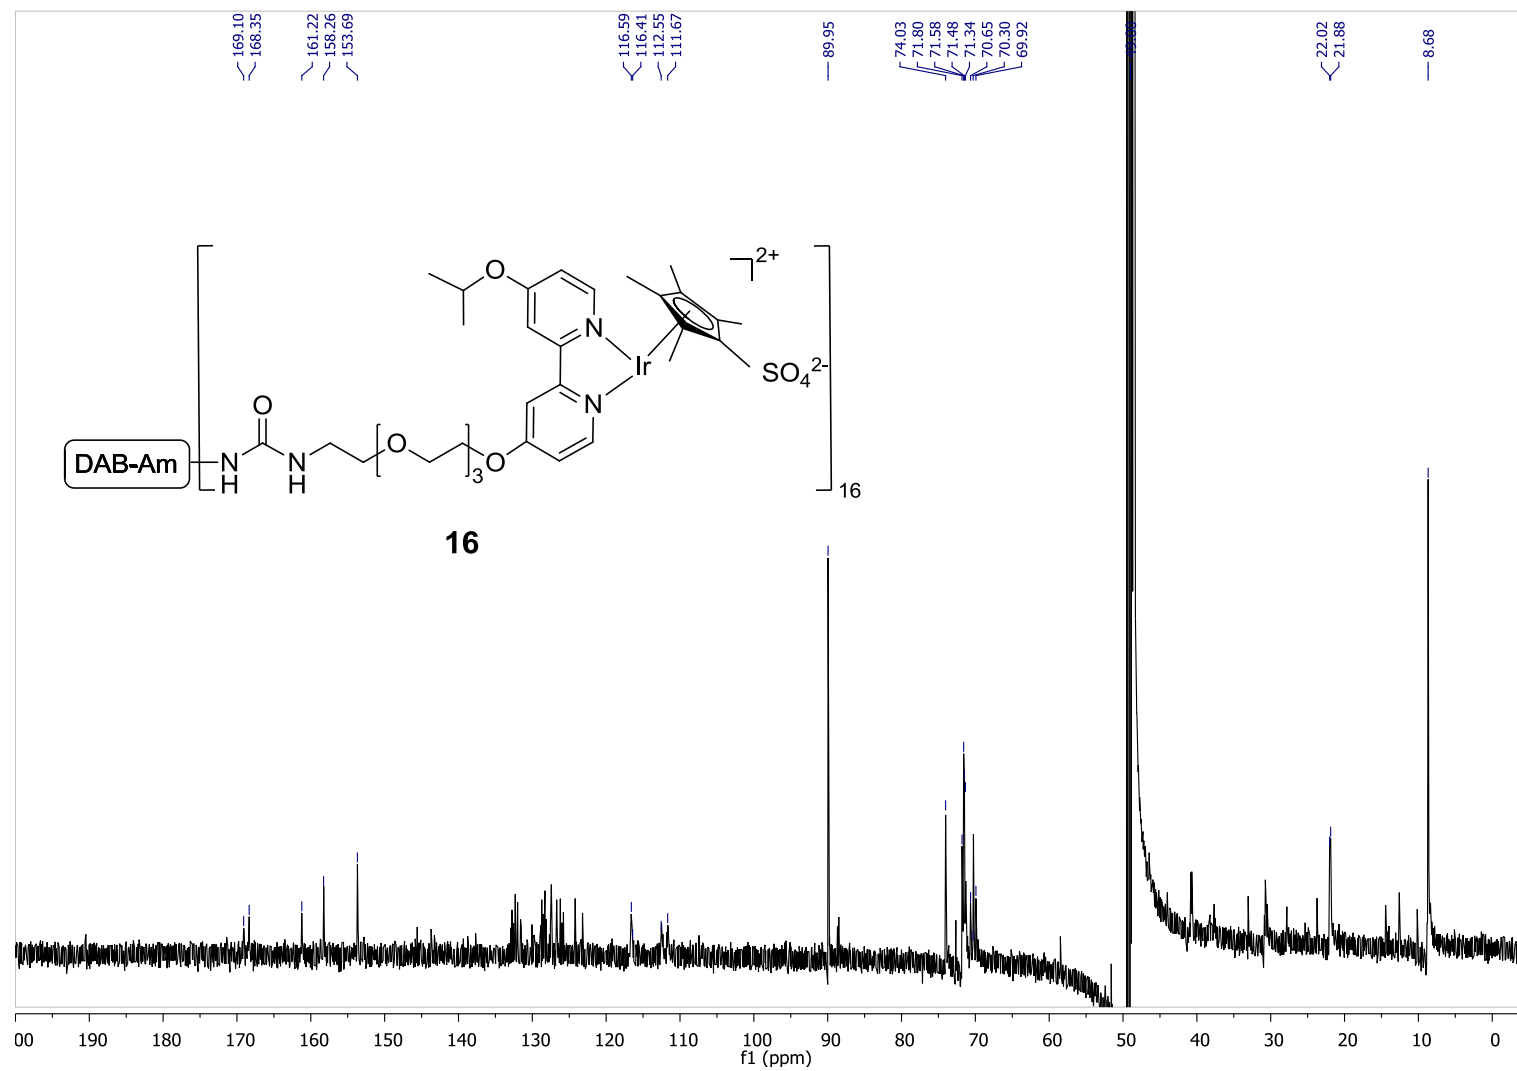

17 <sup>1</sup>H NMR

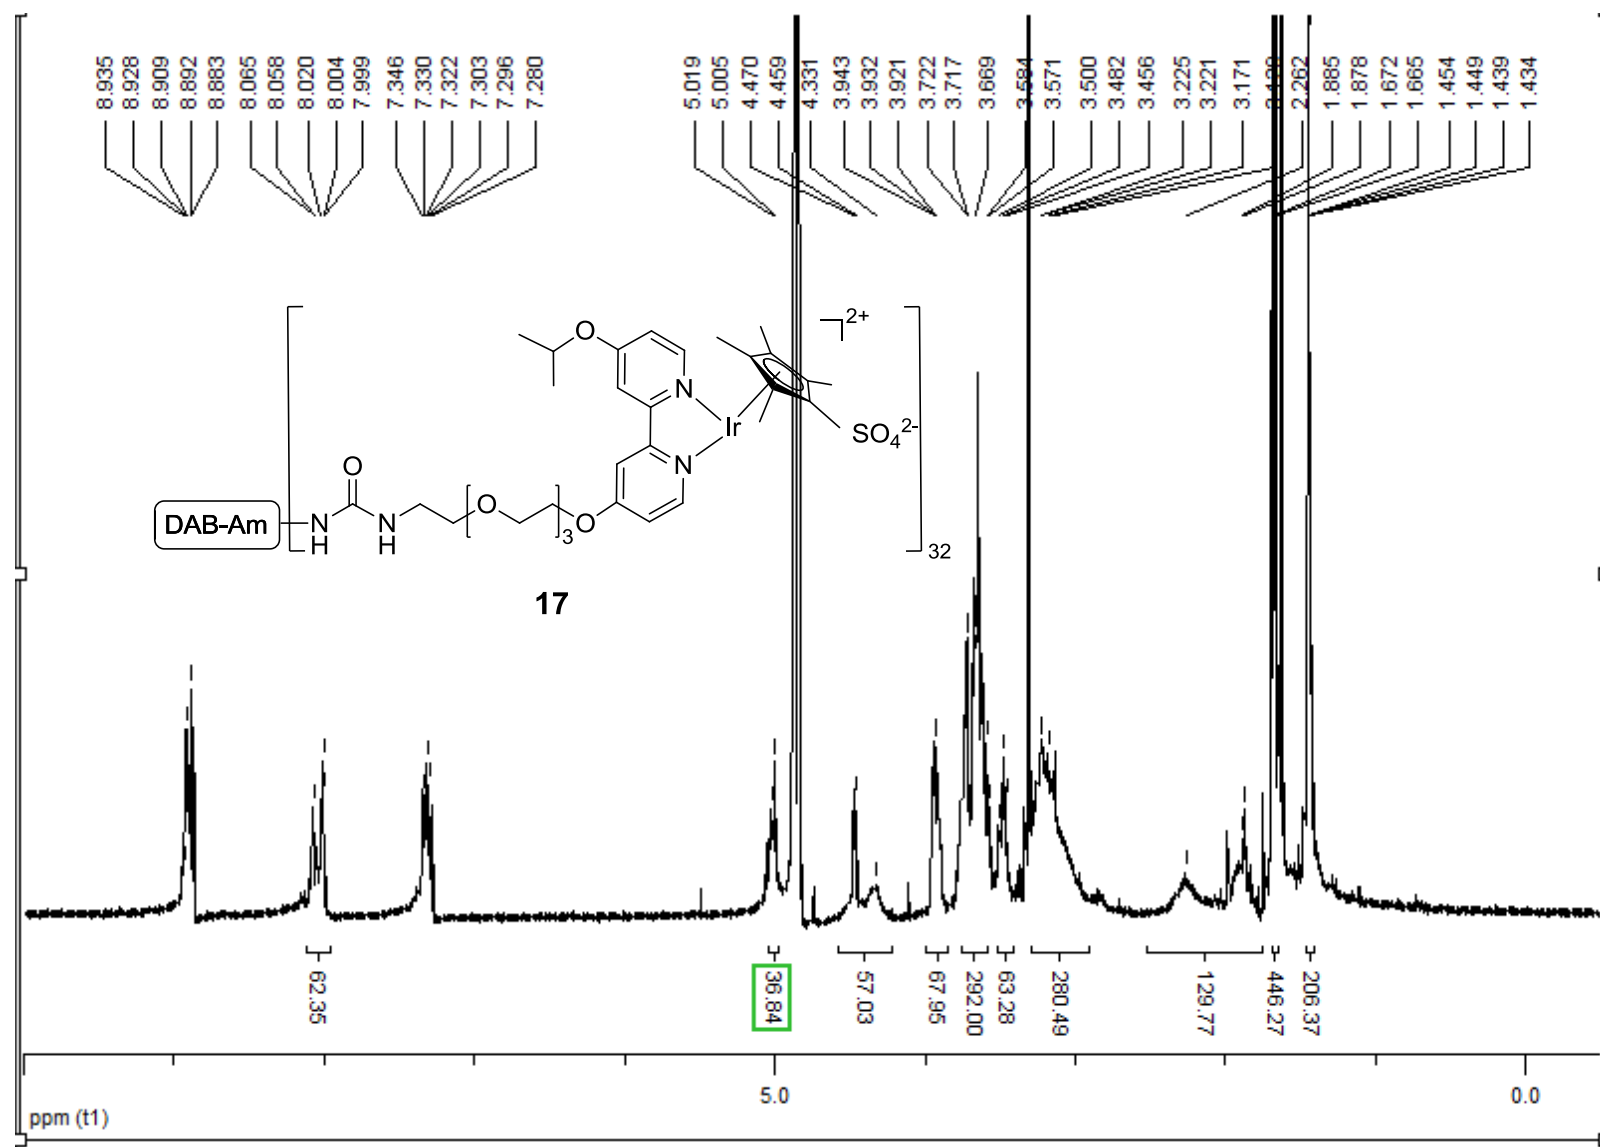

17 <sup>13</sup>C NMR

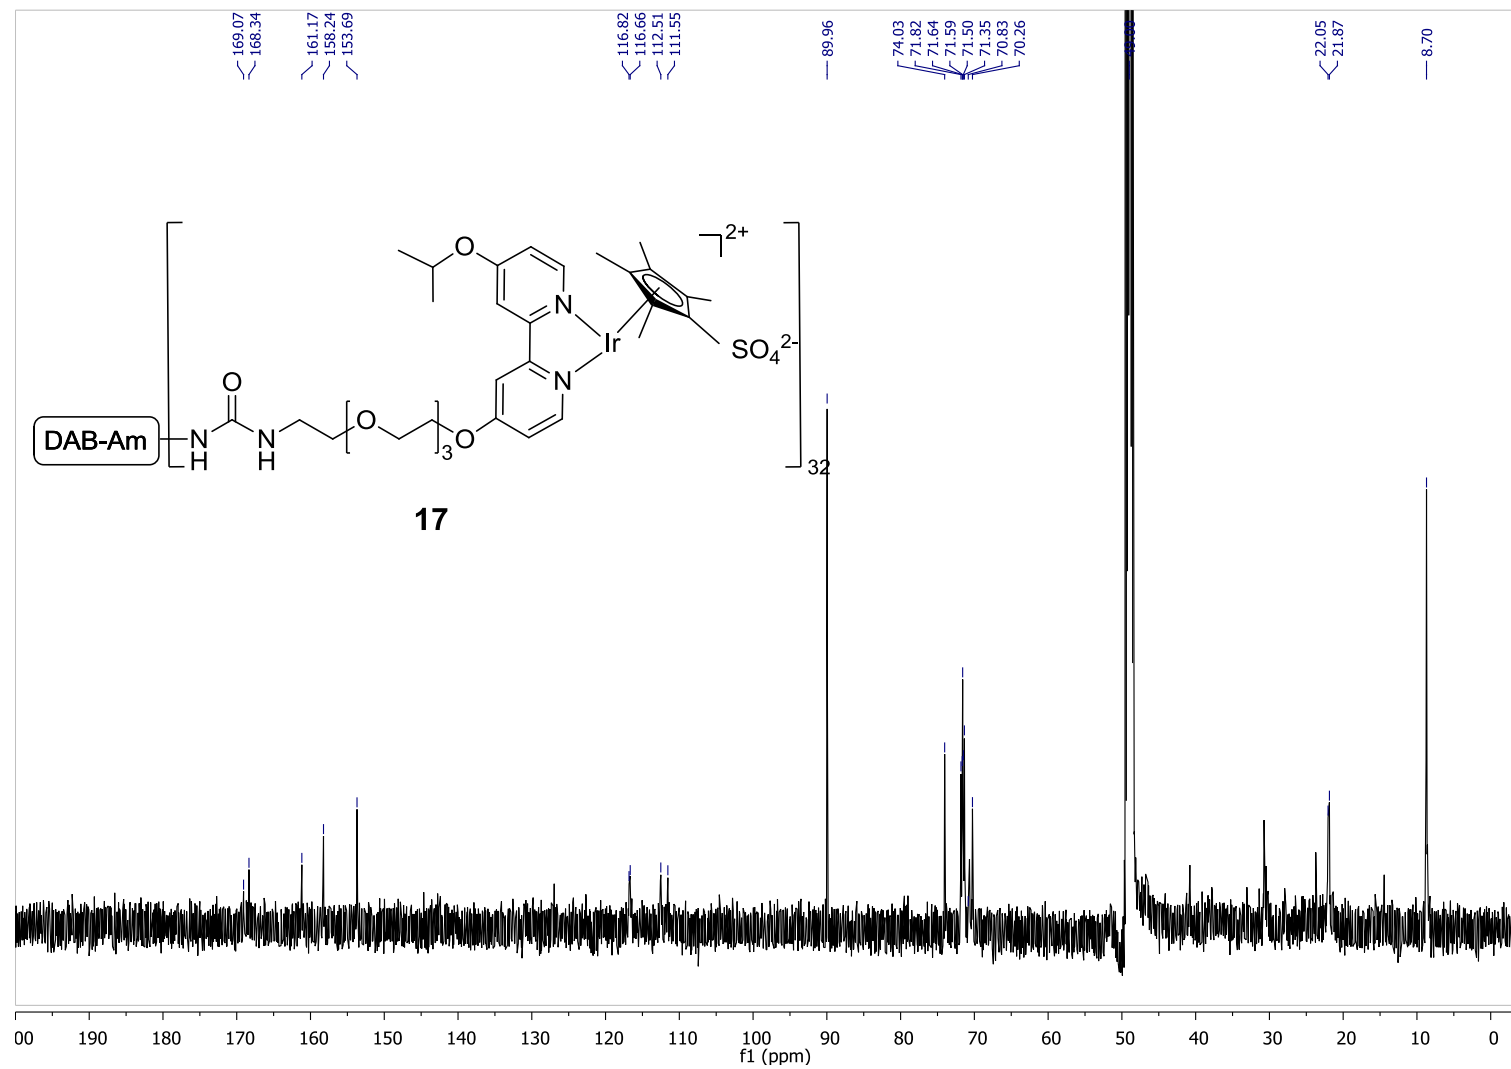

19 <sup>1</sup>H NMR

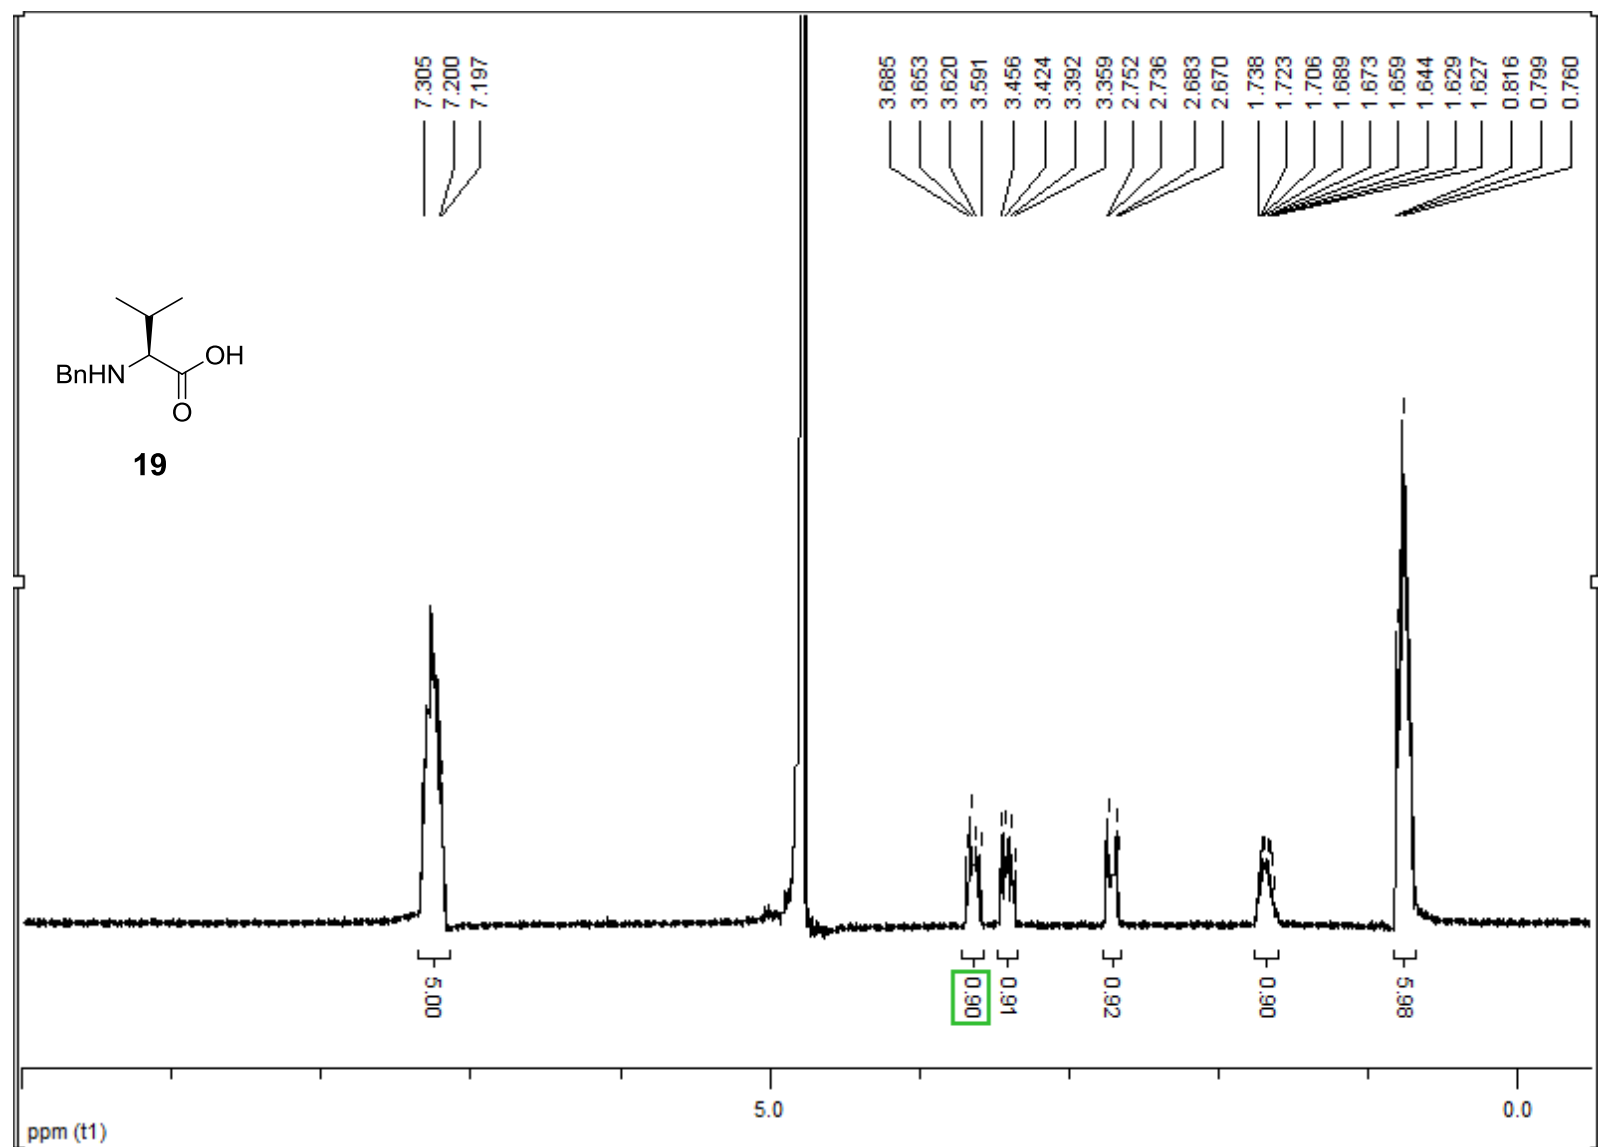



19 <sup>13</sup>C NMR

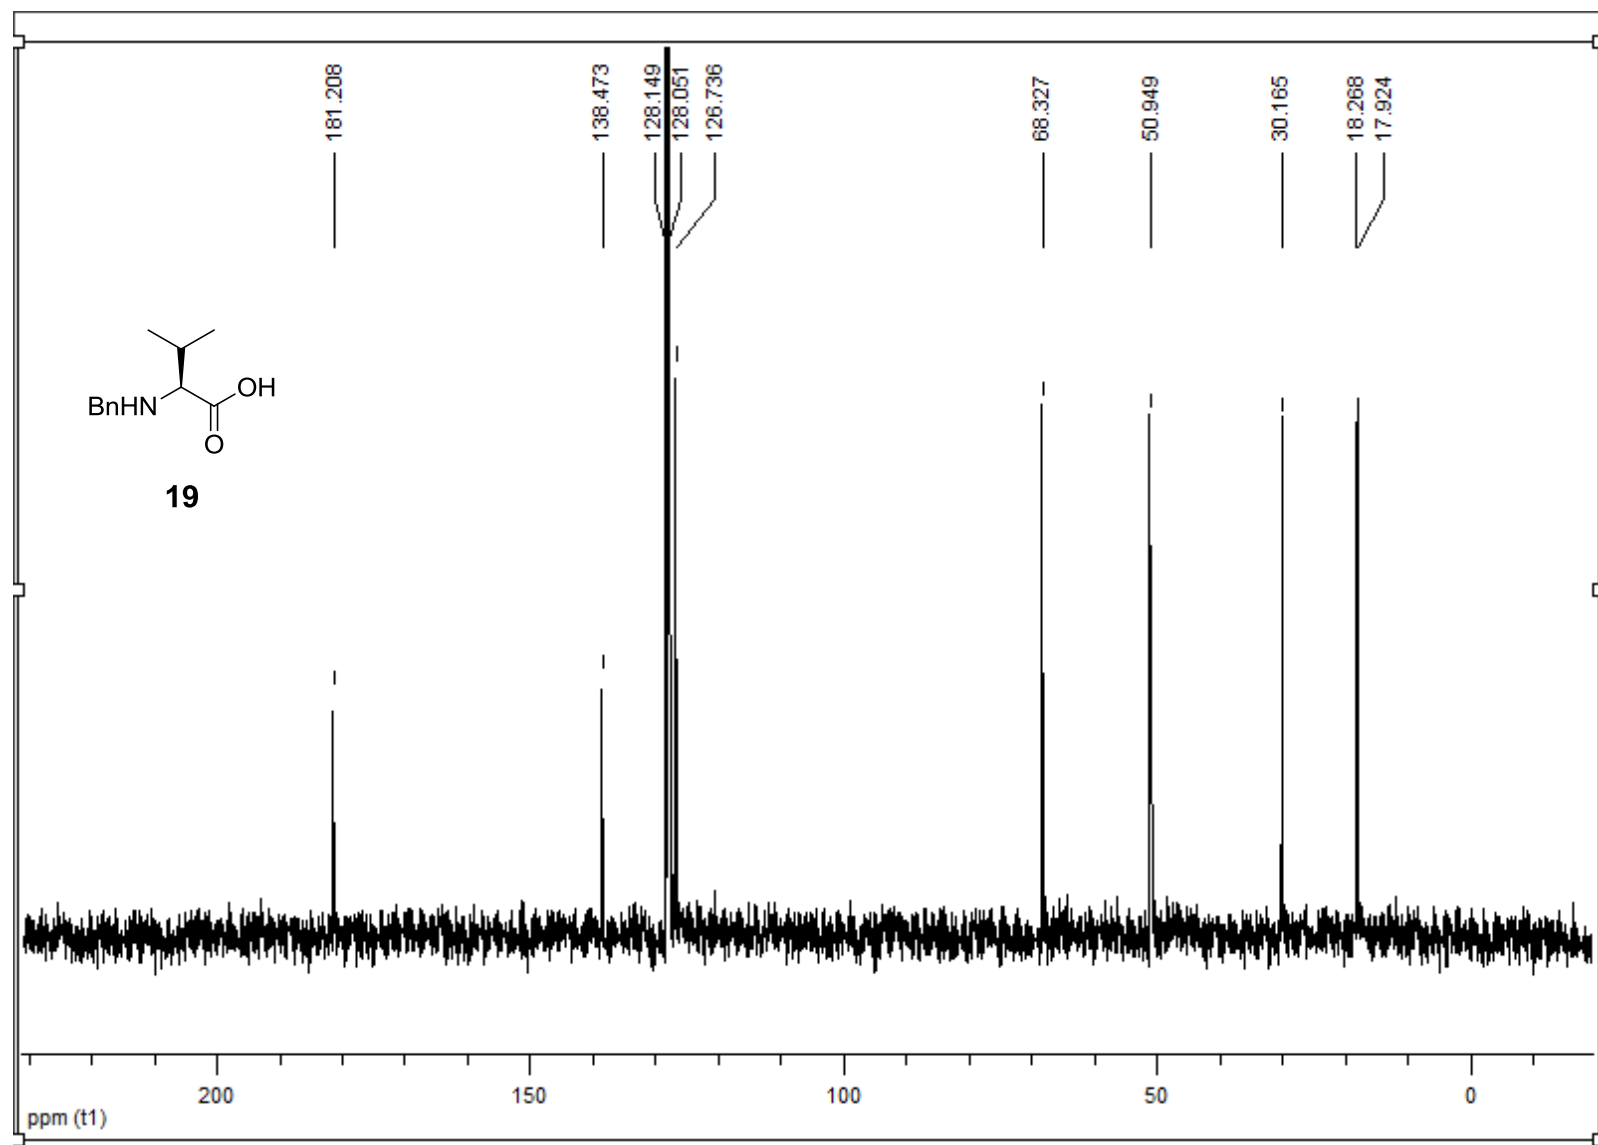

Supplement: Additional file 2 [file 1860-5397-9-110-S2.pdf]
